# Supplementary material for: Effect of ice slushy ingestion and cold water immersion on thermoregulatory behavior
Source: PubMed Central journal article supplement (PMC6392407; doi:10.1371/journal.pone.0212966), 2019-02-27
Supplement: pone.0212966.s001.pdf [file pone.0212966.s001.pdf]

**S1 Table. Rectal temperature ( $T_{re}$ ) response during 60 min of cycling at fixed intensity following 30 min of precooling (study 1).** CON, control; CWI, cold water immersion, ICE, ice slushy ingestion.

|                   | CON      |               | CWI      |               | ICE      |               |
|-------------------|----------|---------------|----------|---------------|----------|---------------|
|                   | <i>n</i> | $T_{re}$ (°C) | <i>n</i> | $T_{re}$ (°C) | <i>n</i> | $T_{re}$ (°C) |
| <b>Precooling</b> |          |               |          |               |          |               |
| 0 min             | 10       | 37.3 ± 0.3    | 10       | 37.3 ± 0.1    | 10       | 37.3 ± 0.2    |
| 30 min            | 10       | 37.3 ± 0.3    | 10       | 37.4 ± 0.1    | 10       | 37.1 ± 0.3    |
| <b>Exercise</b>   |          |               |          |               |          |               |
| 0 min             | 10       | 37.3 ± 0.3    | 10       | 37.4 ± 0.1    | 10       | 37.0 ± 0.3    |
| 5 min             | 10       | 37.4 ± 0.2    | 10       | 37.4 ± 0.2    | 10       | 37.1 ± 0.2    |
| 10 min            | 10       | 37.5 ± 0.2    | 10       | 37.5 ± 0.2    | 10       | 37.2 ± 0.2    |
| 15 min            | 10       | 37.6 ± 0.2    | 10       | 37.6 ± 0.2    | 9        | 37.4 ± 0.3    |
| 20 min            | 10       | 37.7 ± 0.3    | 9        | 37.7 ± 0.3    | 9        | 37.6 ± 0.3    |
| 25 min            | 10       | 37.8 ± 0.3    | 9        | 37.8 ± 0.3    | 9        | 37.7 ± 0.3    |
| 30 min            | 10       | 37.9 ± 0.3    | 9        | 37.9 ± 0.4    | 9        | 37.9 ± 0.4    |
| 35 min            | 10       | 38.0 ± 0.3    | 9        | 38.0 ± 0.4    | 9        | 38.0 ± 0.4    |
| 40 min            | 10       | 38.1 ± 0.4    | 9        | 38.1 ± 0.4    | 9        | 38.2 ± 0.5    |
| 45 min            | 9        | 38.3 ± 0.4    | 8        | 38.2 ± 0.5    | 9        | 38.3 ± 0.5    |
| 50 min            | 9        | 38.4 ± 0.5    | 8        | 38.3 ± 0.6    | 9        | 38.4 ± 0.5    |
| 55 min            | 9        | 38.5 ± 0.5    | 8        | 38.5 ± 0.6    | 8        | 38.5 ± 0.6    |
| 60 min            | 9        | 38.6 ± 0.6    | 8        | 38.6 ± 0.6    | 9        | 38.7 ± 0.7    |
