# Supplementary material for: Effect of ice slushy ingestion and cold water immersion on thermoregulatory behavior
Source: PubMed Central journal article supplement (PMC6392407; doi:10.1371/journal.pone.0212966), 2019-02-27
Supplement: pone.0212966.s004.pdf [file pone.0212966.s004.pdf]

**S4 Table. Rectal-to-skin temperature ( $T_{re}-T_{sk}$ ) gradient response during 60 min of cycling at RPE 15 following 30 min of precooling (study 2). CON, control; CWI, cold water immersion, ICE, ice slushy ingestion.**

|            | CON      |                      | CWI      |                      | ICE      |                      |
|------------|----------|----------------------|----------|----------------------|----------|----------------------|
| Precooling | <i>n</i> | $T_{re}-T_{sk}$ (°C) | <i>n</i> | $T_{re}-T_{sk}$ (°C) | <i>n</i> | $T_{re}-T_{sk}$ (°C) |
| 0 min      | 11       | 2.7 ± 0.5            | 11       | 2.5 ± 0.4            | 11       | 2.6 ± 0.3            |
| 30 min     | 11       | 2.6 ± 0.6            | 11       | 5.6 ± 0.5            | 11       | 2.0 ± 0.3            |
| Exercise   |          |                      |          |                      |          |                      |
| 0 min      | 11       | 2.8 ± 0.7            | 11       | 4.0 ± 0.6            | 11       | 1.8 ± 0.3            |
| 5 mn       | 11       | 2.9 ± 0.7            | 11       | 3.7 ± 0.9            | 11       | 2.0 ± 0.4            |
| 10 min     | 11       | 2.4 ± 0.5            | 11       | 3.3 ± 0.9            | 11       | 2.0 ± 0.2            |
| 15 min     | 11       | 2.3 ± 0.4            | 11       | 2.9 ± 0.6            | 11       | 2.0 ± 0.3            |
| 20 min     | 11       | 2.4 ± 0.4            | 11       | 2.7 ± 0.5            | 11       | 2.2 ± 0.3            |
| 25 min     | 11       | 2.5 ± 0.4            | 11       | 2.8 ± 0.4            | 11       | 2.3 ± 0.4            |
| 30 min     | 11       | 2.7 ± 0.3            | 10       | 2.9 ± 0.4            | 11       | 2.5 ± 0.5            |
| 35 min     | 11       | 2.7 ± 0.4            | 10       | 2.9 ± 0.4            | 11       | 2.7 ± 0.5            |
| 40 min     | 11       | 2.8 ± 0.4            | 10       | 3.0 ± 0.4            | 11       | 2.8 ± 0.5            |
| 45 min     | 11       | 2.9 ± 0.4            | 11       | 3.2 ± 0.3            | 11       | 3.0 ± 0.5            |
| 50 min     | 11       | 3.0 ± 0.4            | 10       | 3.2 ± 0.3            | 10       | 3.2 ± 0.6            |
| 55 min     | 11       | 3.1 ± 0.4            | 10       | 3.3 ± 0.4            | 10       | 3.4 ± 0.7            |
| 60 min     | 11       | 3.1 ± 0.5            | 11       | 3.4 ± 0.5            | 10       | 3.3 ± 0.5            |
