# Supplementary material for: Effect of ice slushy ingestion and cold water immersion on thermoregulatory behavior
Source: PubMed Central journal article supplement (PMC6392407; doi:10.1371/journal.pone.0212966), 2019-02-27
Supplement: pone.0212966.s005.pdf [file pone.0212966.s005.pdf]

**S5 Table. Effect sizes (Cohen's *d*) calculated for the mean physiological and perceptual responses, rectal temperature ( $T_{re}$ ) and weighted mean body temperature ( $T_b$ ) at the onset of sweating and sweat sensitivity during steady state exercise (study 1) and during the RPE clamp exercise (study 2). CON, control; CWI, cold water immersion, ICE, ice slushy ingestion.**

| Study 1:                                                                                      | <i>n</i> | CON         | CWI         | ICE         | Cohen's <i>d</i> |            |            |
|-----------------------------------------------------------------------------------------------|----------|-------------|-------------|-------------|------------------|------------|------------|
|                                                                                               |          |             |             |             | CON vs CWI       | CON vs ICE | CWI vs ICE |
| Whole body sweat loss (mL)                                                                    | 11       | 1244 ± 374  | 1064 ± 343  | 1128 ± 329  | 0.50             | 0.33       | 0.19       |
| Thermal sensation (AU)                                                                        | 11       | 6 ± 1.1     | 5.7 ± 0.6   | 5.8 ± 0.7   | 0.34             | 0.22       | 0.15       |
| RPE (AU)                                                                                      | 11       | 13.5 ± 1.9  | 13.4 ± 1.8  | 13.4 ± 1.6  | 0.05             | 0.06       | 0.00       |
| Heart rate (beats·min <sup>-1</sup> )                                                         | 11       | 154 ± 14    | 149 ± 15    | 153 ± 14    | 0.34             | 0.07       | 0.28       |
| $T_{re}\Delta$ (°C)                                                                           | 8        | 1.3 ± 0.5   | 1.2 ± 0.6   | 1.6 ± 0.6   | 0.18             | 0.54       | 0.67       |
| LSR <sub>arm</sub>                                                                            | 11       | 1.25 ± 0.75 | 1.1 ± 0.53  | 1.14 ± 0.44 | 0.23             | 0.18       | 0.08       |
| LSR <sub>th</sub>                                                                             | 11       | 0.71 ± 0.46 | 0.74 ± 0.36 | 0.69 ± 0.35 | 0.07             | 0.05       | 0.14       |
| <b>Study 2:</b>                                                                               |          |             |             |             |                  |            |            |
| Mean power output (W)                                                                         | 11       | 130 ± 20    | 138 ± 18    | 129 ± 25    | 0.42             | 0.04       | 0.41       |
| Total work output (kJ)                                                                        | 11       | 470 ± 74    | 498 ± 65    | 464 ± 90    | 0.40             | 0.07       | 0.43       |
| Whole body sweat loss (mL)                                                                    | 11       | 1394 ± 381  | 1239 ± 367  | 1396 ± 119  | 0.41             | 0.01       | 0.58       |
| Heart rate (beats·min <sup>-1</sup> )                                                         | 11       | 144 ± 20    | 141 ± 14    | 144 ± 15    | 0.17             | 0.00       | 0.21       |
| $T_{re}\Delta$ (°C)                                                                           | 11       | 1.4 ± 0.5   | 1.2 ± 0.6   | 1.7 ± 0.5   | 0.36             | 0.60       | 0.91       |
| LSR <sub>arm</sub>                                                                            | 11       | 1.21 ± 0.35 | 1.21 ± 0.53 | 1.2 ± 0.6   | 0.00             | 0.02       | 0.02       |
| LSR <sub>th</sub>                                                                             | 11       | 0.63 ± 0.19 | 0.68 ± 0.29 | 0.66 ± 0.27 | 0.20             | 0.13       | 0.07       |
| <b><math>T_{re}</math> and <math>T_b</math> at the sweat threshold and sweat sensitivity:</b> |          |             |             |             |                  |            |            |
| Onset of sweating (min)                                                                       | 19       | 1.8 ± 1.8   | 6.4 ± 2.2   | 2.7 ± 1.6   | 2.29             | 0.53       | 1.92       |
| $T_{re}$ sweat threshold (°C)                                                                 | 19       | 37 ± 0.3    | 37.1 ± 0.2  | 36.8 ± 0.3  | 0.39             | 0.67       | 1.18       |
| $T_b$ sweat threshold (°C)                                                                    | 19       | 36.5 ± 0.3  | 36.5 ± 0.3  | 36.5 ± 0.4  | 0.00             | 0.00       | 0.00       |
| $T_{re}$ sweat sensitivity (mg·cm <sup>-2</sup> ·min <sup>-1</sup> ·°C <sup>-1</sup> )        | 19       | 1.51 ± 0.61 | 1.89 ± 0.82 | 1.42 ± 0.68 | 0.53             | 0.14       | 0.62       |
| $T_b$ sweat sensitivity (mg·cm <sup>-2</sup> ·min <sup>-1</sup> ·°C <sup>-1</sup> )           | 19       | 1.18 ± 0.42 | 1.36 ± 0.55 | 1.39 ± 0.63 | 0.37             | 0.39       | 0.05       |
