# Supplementary material for: Effect of ice slushy ingestion and cold water immersion on thermoregulatory behavior
Source: PLoS One. 2019 Feb 27;14(2):e0212966. doi: 10.1371/journal.pone.0212966 (PMC6392407; doi:10.1371/journal.pone.0212966)
Supplement: S1 Dataset — CON, control; CWI, cold water immersion, ICE, ice slushy ingestion. (XLSX) [file pone.0212966.s006.xlsx]

## Sheet: Study 1 & 2 data
Study1											Study 2													Study 1												Study 2												Sweat onset & sensitivity data (Study 1 & 2)
ID	Treatment	Time	Skin temperature (°C)	Rectal temperature (°C)	Core-to-skin temperature gradient (°C)	HbO2	Hb	tHb	TOI		ID	Treatment	Time	Skin temperature (°C)	Rectal temperature (°C)	Core-to-skin temperature gradient (°C)	Thermal sensation	HbO2	Hb	tHb	TOI	Skin PU		ID	Treatment	Baseline body mass (kg)	Whole body sweat loss (mL)	Urine specific gravity (g/mL)	Mean RPE	Mean thermal sensation	Mean HR (bpm)	Change in rectal temperature during exercise (°C)	Arm sweat rate (mg/cm2/min)	Thigh sweat rate (mg/cm2/min)		ID	Treatment	Baseline body mass (kg)	Whole body sweat loss (mL)	Urine specific gravity (g/mL)	Mean HR (bpm)	Change in rectal temperature during exercise (°C)	Arm sweat rate (mg/cm2/min)	Thigh sweat rate (mg/cm2/min)	Mean power output (W)	Total work output (kJ)			ID
1	CON	COOL0	34.715	36.7	1.985	0	0	0	0		1	CON	COOL0	35.05	37.7	2.65	5	0	0	0	0	20.4326		1	CON	69.27	902	1.01	16.3333	6.83333	159.389	1.1	0.99	0.328333		1	CON	61.242	915	1.031	161.25	1.3	1.22333	0.534007	111.017	399.66		Study 1	1
1	CON	COOL30	34.77	36.8	2.03	64.5226	-9.76974	54.883	2.79932		1	CON	COOL30	34.8318	37.6	2.76818	4.5	145.474	-15.3841	130.339	4.49806	37.6719		2	CON	70.77	1204	1.02	12.1667	6.45833	124.819	0.8	1.835	0.808333		2	CON	85.69	1128	1.025	157.771	1.74167	0.899843	0.358036	121.783	438.42		Study 1	2
1	CON	EX0	34.8675	36.8	1.9325	101.659	-6.52698	95.3562	3.63187		1	CON	EX0	34.7867	37.5	2.71333	4	17.2734	12.3195	29.5714	-2.13084	11.6338		3	CON	77.45	1546	1.01	14.75	6.70833	173.931	1.5	0.9275	0.590833		3	CON	84.67	1400	1.015	133.187	0.9	1.09467	0.68127	130.817	470.94		Study 1	3
1	CON	EX05	34.54	36.8167	2.27667	39.6229	44.7038	84.4945	-2.47125		1	CON	EX05	34.6967	37.6	2.90333	4	-58.2947	202.746	144.557	-20.2571	62.4385		4	CON	73.16	806	1.026	12	6.04167	160.41		1.1525	0.4275		4	CON	98.2	2344	1.011	150.556	1.90833	1.63763	0.651464	173.183	623.46		Study 1	4
1	CON	EX10	34.9175	37	2.0825	99.5861	65.2728	165.195	-2.87901		1	CON	EX10	35.1392	37.8583	2.71917	4	-45.2245	244.63	199.651	-23.3938	68.4029		5	CON	79.22	1632	1.012	15.25	6.20833	133.819	1.4	2.43583	1.7725		5	CON	70.85	1260	1.022	123.11	0.9	0.761892	0.707725	107.95	388.62		Study 1	5
1	CON	EX15	35.1117	37.1	1.98833	105.289	72.6746	178.315	-3.43026		1	CON	EX15	35.215	38.0917	2.87667	3.5	-37.9297	266.083	228.42	-24.8597	68.3143		6	CON	86.73	1038	1.01	11.0833	5.54167	157.91	0.6	0.63	0.704167		6	CON	90.03	1408	1.027	137.618	1.1	1.11886	0.737029	143.3	515.88		Study 1	6
1	CON	EX20	35.165	37.2	2.035	116.661	85.9506	202.995	-4.40078		1	CON	EX20	35.2775	38.3	3.0225	3.5	-2.40407	233.198	231.097	-21.2171	69.8042		7	CON	71.94	842	1.012	11.3333	4.16667	149.014		0.4325	0.245833		7	CON	76.09	1294	1.012	151.659	1.8	1.03786	0.517095	135.833	489		Study 1	9
1	CON	EX25	35.3	37.3	2	119.679	83.8934	203.947	-4.16484		1	CON	EX25	35.3275	38.4	3.0725	4	18.1586	245.926	264.498	-21.1346	66.0936		8	CON	66.83	1566	1.005	15.0833	7.29167	161.701		1.81583	1.0125		8	CON	59.52	1528	1.012	164.667	1.72	1.19345	0.72764	135.617	488.22		Study 1	11
1	CON	EX30	35.2067	37.4	2.19333	155.605	85.341	241.443	-3.16318		1	CON	EX30	35.415	38.6	3.185	5	45.3241	223.34	269.116	-18.6967	68.8426		9	CON	99.99	1148	1.007	15.25	6.83333	147.333	1.1	0.761667	0.86		9	CON	99.83	1054	1.015	115.55	0.4	0.918001	0.302864	100.533	361.92		Study 2	12
1	CON	EX35	35.33	37.5	2.17	167.392	92.4167	260.343	-3.52104		1	CON	EX35	35.6083	38.7	3.09167	5	73.6288	208.725	282.824	-17.069	69.2174		10	CON	83.64	1050	1.016	11.4167	4	159.417	1.4	0.386667	0.0883333		10	CON	76.44	1686	1.007	170.014	1.99167	1.46863	0.877475	147.5	531		Study 2	13
1	CON	EX40	35.2675	37.5667	2.29917	183.471	86.1885	270.233	-2.50339		1	CON	EX40	35.6217	38.7	3.07833	5.5	95.2446	215.513	311.305	-16.3432	66.0281		11	CON	70.77	1948	1.011	13.75	5.54167	164.521	2.3	2.4125	0.951667		11	CON	79.36	1320	1.004	114.027	1.2	1.9377	0.872391	127.833	460.2		Study 2	14
1	CON	EX45	35.435	37.625	2.19	194.664	94.4414	289.779	-2.84781		1	CON	EX45	35.6458	38.8	3.15417	5.5	110.581	206.022	317.165	-15.3399	71.4935		1	CWI	69.16	802	1.004	15.3333	6.08333	157.833	1.2	1.10917	0.769167		1	CWI	61.74	748	1.021	141.327	0.7	1.09103	0.478817	115.467	415.68		Study 2	15
1	CON	EX50	35.3492	37.7	2.35083	193.307	98.7415	292.667	-3.35068		1	CON	EX50	35.7358	38.8	3.06417	5.5	110.383	239.495	350.462	-17.647	72.3697		2	CWI	70.55	1034	1.022	12.75	6.375	122.042	0.6	1.07917	0.909167		2	CWI	85.434	812	1.027	135.333	0.9	0.478983	0.180408	131	471.6		Study 2	16
1	CON	EX55	35.5675	37.8	2.2325	197.144	103.872	301.614	-3.53417		1	CON	EX55	35.7292	38.8	3.07083	5.5	92.5562	262.645	355.832	-20.6171	80.2726		3	CWI	77.39	1086	1.021	13.25	4.875	165.722	1.1	0.804167	0.448333		3	CWI	85.77	1180	1.012	138.903	1.2	1.21865	0.644149	155.433	559.56		Study 2	17
1	CON	EX60	35.8925	37.9	2.0075	205.72	106.924	313.281	-3.44276		1	CON	EX60	35.7633	38.8	3.03667	5	132.547	231.633	364.783	-16.3048	68.0957		4	CWI	73.39	896	1.008	10.1667	5.91667	159.313		1.25057	0.545		4	CWI	98.04	2014	1.019	135.944	1.8	2.45134	0.755548	172.017	619.26		Study 2	18
2	CON	COOL0	34.69	37.2167	2.52667	0	0	0	0		2	CON	COOL0	34.59	37	2.41	4	0	0	0	0	15.2811		5	CWI	79.42	1245	1.006	14.4167	5.75	130.771	1.63333	1.36417	1.07333		5	CWI	71.11	1250	1.024	141.021	1.19167	0.789102	0.665605	133.033	478.92		Study 2	19
2	CON	COOL30	35.0467	37.4	2.35333	-34.4237	128.739	94.4456	-10.9637		2	CON	COOL30	34.7758	37.1	2.32417	4	165.269	11.0855	176.737	0.69974	46.8043		6	CWI	87.5	808	1.01	12.0833	4.79167	154.972	0.5	0.755	0.816667		6	CWI	89.54	1298	1.021	144.132	0.7	1.10139	0.788199	147.967	532.68		Study 2	20
2	CON	EX0	34.9417	37.3	2.35833	-26.4708	164.152	137.876	-12.3512		2	CON	EX0	34.7592	37.1	2.34084	4	97.3806	33.923	131.611	-4.37813	38.9661		7	CWI	72.7	602	1.005	12.1667	4.95833	137.639		0.674167	0.44		7	CWI	77.04	1054	1.008	155.653	2.04	0.837663	0.427401	143.983	518.34		Study 2	21
2	CON	EX05	34.765	37.3833	2.61833	-22.4356	285.841	264.788	-17.8701		2	CON	EX05	35.045	37.25	2.205	4	15.2242	257.222	272.913	-27.414	83.3781		8	CWI	67.2	1286	1.005	16.8333	6.75	148.729		1.7075	1.28583		8	CWI	61.248	1496	1.009	160.958	1.65833	1.21388	0.872003	137.217	493.98		Study 2	22
2	CON	EX10	35.2725	37.4	2.1275	-25.2826	340.414	315.641	-20.5037		2	CON	EX10	35.4633	37.4	1.93667	4	81.638	191.762	273.899	-18.9492	85.7161		9	CWI	101.59	1358	1.006	14.4167	6	136.382	0.7	0.933333	0.766667		9	CWI	100.02	964	1.02	117.951	0.2	0.955122	0.460871	109.283	393.42		Study 1	1
2	CON	EX15	35.295	37.5	2.205	-23.8592	360.971	337.639	-21.6273		2	CON	EX15	35.68	37.5	1.82	4	74.0148	210.238	284.778	-21.5935	81.2383		10	CWI	84.194	784	1.02	12.75	5.375	161.153	1.4	0.225833	0.0283333		10	CWI	77.61	1616	1.004	162.409	1.7	1.67829	1.20853	149.283	537.42		Study 1	2
2	CON	EX20	35.2908	37.6	2.30917	-44.9286	389.409	345.018	-23.3429		2	CON	EX20	35.705	37.7	1.995	4	90.8196	203.803	295.194	-20.0091	84.388		11	CWI	70.37	1808	1.008	13.5833	5.5	165.924	2.2	2.16917	1.07		11	CWI	77.7	1200	1.019	121.856	1.3	1.5101	0.961213	128.35	462.06		Study 1	3
2	CON	EX25	35.25	37.7	2.45	-34.3097	392.956	359.201	-23.3008		2	CON	EX25	35.5908	37.8	2.20917	4	77.4919	234.457	312.536	-24.5844	85.7684		1	ICE	69.7	912	1.003	14.8333	5.95833	157.611	1.45	0.833333	0.505		1	ICE	62	828	1.01	141.285	1.51667	0.759228	0.481289	110.8	398.88		Study 1	4
2	CON	EX30	35.215	37.8	2.585	-29.1391	404.283	375.709	-23.7463		2	CON	EX30	35.6467	38	2.35333	4	94.1276	229.748	324.466	-22.8665	75.8774		2	ICE	72.12	1234	1.027	12.1667	6.29167	123.722	1.11667	1.46	0.873333		2	ICE	85.212	872	1.022	142.167	1.66667	0.659193	0.263715	75.9667	273.48		Study 1	5
2	CON	EX35	35.4117	37.9	2.48833	-41.3218	424.778	384.04	-24.7833		2	CON	EX35	35.7317	38.1	2.36833	4.5	72.7495	260.422	333.775	-26.4018	70.2224		3	ICE	77.45	1086	1.015	13.5	5.45833	172.264	1.6	0.821667	0.371667		3	ICE	84.38	1290	1.011	139.438	1.2	1.03374	0.60617	135.8	488.88		Study 1	6
2	CON	EX40	35.435	38	2.565	-27.0713	408.13	381.67	-23.7978		2	CON	EX40	35.8167	38.2917	2.47501	4.5	75.9599	264.499	341.053	-26.987	68.3179		4	ICE	74	946	1.015	11.6667	6.08333	157.931		1.05083	0.535		4	ICE	98.96	2204	1.025	137.375	2.2	2.46586	0.757324	163.517	588.66		Study 1	9
2	CON	EX45	35.3542	38	2.64583	6.37896	383.109	390.096	-21.7166		2	CON	EX45	35.9567	38.4333	2.47666	5	63.3855	299.656	363.674	-29.6285	68.6199		5	ICE	80.22	1565	1.002	16	6.25	144.882	1.60833	1.655	1.14083		5	ICE	71.94	1140	1.014	128.583	1.2	0.684484	0.477746	119.35	429.66		Study 1	11
2	CON	EX50	35.305	38.0417	2.73667	-24.1695	410.301	386.748	-23.5589		2	CON	EX50	36.0108	38.6	2.58917	5	66.376	300.106	367.134	-29.3206	65.5421		6	ICE	87.11	748	1.006	12.0833	5.08333	152.542	1	0.7225	0.590833		6	ICE	89.5	1478	1.027	157.75	1.5	0.781428	1.07007	163.183	587.46		Study 2	12
2	CON	EX55	35.0525	38.1	3.0475	-16.1215	410.005	394.494	-24.0304		2	CON	EX55	36.0525	38.7	2.6475	5	73.357	321.453	395.538	-29.9615	69.73		7	ICE	72.65	762	1.003	11.75	5	141.215		0.949167	0.194167		7	ICE	76.15	1194	1.007	153.486	2.1	0.68127	0.312784	142.133	511.68		Study 2	13
2	CON	EX60	35.255	38.1	2.845	-21.5465	427.072	406.134	-24.3319		2	CON	EX60	36.2733	38.8417	2.56833	5	178.597	215.002	394.388	-16.4982	70.222		8	ICE	66.92	1466	1.008	15.8333	7.20833	157.056		1.23083	1.23583		8	ICE	60.461	1679	1.009	170.162	2.3	1.25823	0.804258	138.583	498.9		Study 2	14
3	CON	COOL0	33.9467	37.15	3.20333	0	0	0	0		3	CON	COOL0	35.184	37.5	2.316	4.5	0	0	0	0	29.71		9	ICE	101.25	948	1.006	12.8333	5.91667	140.965	1.325	1.08583	0.75		9	ICE	99.24	1504	1.002	135.895	0.8	1.37666	0.711437	113.017	406.86		Study 2	15
3	CON	COOL30	34.5833	37.2	2.61667	119.249	59.2756	178.834	-1.89365		3	CON	COOL30	34.841	37.5	2.659	4.5	45.86	-4.33	41.64	0.58	45.37		10	ICE	83.31	1010	1.02	12.6667	4.83333	165.104	1.44167	0.645	0.315		10	ICE	77.44	1716	1.008	162.986	2.43	1.55617	1.11117	133.35	480.06		Study 2	16
3	CON	EX0	34.35	37.2	2.85	85.4037	28.6311	114.223	0.279167		3	CON	EX0	34.056	37.5	3.444	4	-9.02	-14.04	-23.05	0.68	18.53		11	ICE	71.07	1728	1.015	14.5	5.83333	170.896	2.975	2.07083	1.06833		11	ICE	77.6	1450	1.008	119.897	1.9	1.95072	0.716349	120.733	434.64		Study 2	17
3	CON	EX05	33.8742	37.42	3.54583	40.8909	142.445	183.631	-10.9886		3	CON	EX05	34.158	37.5	3.342	4	-56.85	-0.69	-57.66	-2.12	58.89																										Study 2	18
3	CON	EX10	34.0167	37.53	3.51333	154.55	120.445	275.522	-6.47557		3	CON	EX10	35.194	37.6	2.406	4.5	-14.9	9.05	-5.81	-2.92	71.79																										Study 2	19
3	CON	EX15	33.985	37.6	3.615	60.6969	188.416	249.515	-15.8627		3	CON	EX15	35.454	37.7	2.246	4.5	-19.31	14.39	-4.94	-3.78	74.81																										Study 2	20
3	CON	EX20	34.0225	37.8	3.7775	95.8586	187.877	284.236	-15.2913		3	CON	EX20	35.572	37.8	2.228	4.5	-17.46	7.73	-9.71	-3.52	76.36																										Study 2	21
3	CON	EX25	33.98	37.9	3.92	68.9742	207.767	277.223	-18.159		3	CON	EX25	35.664	37.9	2.236	4	-23.24	3.15	-20.11	-3.66	77.09																										Study 2	22
3	CON	EX30	34.0767	37.9	3.82333	64.6478	219.354	284.494	-19.7824		3	CON	EX30	35.714	38	2.286	5	-0.24	10.32	10.14	-4.07	82.34																										Study 1	1
3	CON	EX35	34.1675	38.2	4.0325	96.7962	236.226	333.617	-20.7145		3	CON	EX35	35.782	38.1	2.318	6.5	23.51	8.62	32.23	-3.6	84.38																										Study 1	2
3	CON	EX40	34.22	38.3	4.08	86.5795	235.963	323.123	-20.9856		3	CON	EX40	35.811	38.2	2.389	6.5	43.22	16.36	59.75	-3.89	88.31																										Study 1	3
3	CON	EX45	34.3725	38.5	4.1275	107.394	240.701	348.703	-20.6553		3	CON	EX45	35.803	38.3	2.497	6	40.22	15.85	56.21	-4.03	86.53																										Study 1	4
3	CON	EX50	34.5017	38.5	3.99833	115.456	233.698	349.745	-19.6906		3	CON	EX50	35.36	38.3	2.94	6	42.2	16.45	58.81	-4.11	79.76																										Study 1	5
3	CON	EX55	34.485	38.5167	4.03167	124.436	242.921	368.01	-20.2463		3	CON	EX55	35.278	38.4	3.122	6.5	36.62	17.04	53.8	-4.47	79.41																										Study 1	6
3	CON	EX60	34.6608	38.7	4.03917	128.179	250.925	379.745	-20.8454		3	CON	EX60	35.234	38.4	3.166	6	35.9	17.53	53.56	-4.62	76.1																										Study 1	9
4	CON	COOL0	35.1583	37.5	2.34167	0	0	0	0		4	CON	COOL0	34.1633	37.3	3.13667	4.5	0	0	0	0	20.94																										Study 1	11
4	CON	COOL30	35.46	37.6	2.14	205.118	14.9549	220.566	-1.62943		4	CON	COOL30	34.415	37.2	2.785	4.5	156.6	-17.32	139.66	1.58	21.15																										Study 2	12
4	CON	EX0	35.4325	37.6	2.1675	246.946	-18.1368	229.327	1.61438		4	CON	EX0	33.9542	37.2	3.24584	4.5	87.13	-15.37	71.95	-1.38	16.46																										Study 2	13
4	CON	EX05	35.5375	37.6	2.0625	213.23	131.357	345.303	-6.56052		4	CON	EX05	34.2467	37.2	2.95333	4.5	-35.17	39.83	4.66	-11.85	68.97																										Study 2	14
4	CON	EX10	36.0083	37.7167	1.70833	163.037	196.645	360.381	-11.1022		4	CON	EX10	35.1608	37.3	2.13917	4.5	-24.06	89.47	65.54	-17.66	67.47																										Study 2	15
4	CON	EX15	36.09	37.9	1.81	143.714	214.267	358.64	-12.2134		4	CON	EX15	35.5242	37.4917	1.96751	4.5	35.49	74.72	110.45	-15.18	68.23																										Study 2	16
4	CON	EX20	36.0892	38	1.91083	73.105	282.745	356.497	-17.738		4	CON	EX20	35.7575	37.6667	1.90917	4.5	43.41	92.15	135.84	-17.13	78.48																										Study 2	17
4	CON	EX25	36.1058	38.1667	2.06083	21.0879	334.061	355.764	-22.3833		4	CON	EX25	35.6883	37.875	2.18667	4.5	53.52	96.15	149.99	-17.95	81.63																										Study 2	18
4	CON	EX30	36.1442	38.3	2.15583	4.17948	359.053	363.818	-24.445		4	CON	EX30	35.6058	38.1	2.49417	5	96.9	89.51	186.83	-15.5	83.21																										Study 2	19
4	CON	EX35	36.43	38.4	1.97	14.1121	348.076	362.787	-24.4165		4	CON	EX35	35.6875	38.3667	2.67917	5.5	95.46	87.61	183.47	-15.29	76.49																										Study 2	20
4	CON	EX40	36.2533	38.5833	2.33	7.24573	356.794	364.654	-25.1815		4	CON	EX40	35.395	38.4833	3.08833	6	105.88	84.95	191.24	-14.95	86.5																										Study 2	21
4	CON	EX45	36.4242	38.7	2.27583	-0.336562	367.379	367.618	-26.7255		4	CON	EX45	35.4533	38.6833	3.23	6.5	135.06	73.63	209.18	-13.07	78.53																										Study 2	22
4	CON	EX50	36.455	38.8	2.345	7.05927	364.221	371.894	-26.4709		4	CON	EX50	35.4375	38.825	3.3875	6.5	95.52	88.28	184.19	-16.88	87.99
4	CON	EX55	36.645	38.9667	2.32167	23.4793	352.506	376.61	-26.167		4	CON	EX55	35.2675	39	3.7325	7	89.42	84.02	173.8	-16.16	83.43
4	CON	EX60	36.7733	39.1	2.32667	40.1075	350.302	391.04	-25.8161		4	CON	EX60	35.09	39.1083	4.01833	7	83.35	87.32	171.04	-16.06	77.28
5	CON	COOL0	34.4533	37.9	3.44667	0	0	0	0		5	CON	COOL0	33.9133	38	4.08667	6	0	0	0	0	61.25
5	CON	COOL30	34.3	37.7	3.4	146.324	-49.822	96.7159	3.2301		5	CON	COOL30	33.72	37.9	4.18	6	150.64	2.64	153.6	4.73	62.95
5	CON	EX0	34.45	37.7	3.25	122.27	-17.007	105.47	0.264115		5	CON	EX0	33.3758	37.7	4.32417	6	-31.77	-37.44	-69.35	1.89	23.5
5	CON	EX05	34.5025	37.7	3.1975	25.9453	182.463	208.768	-13.3886		5	CON	EX05	33.2767	37.7	4.42333	6	-21.74	12.28	-9.49	-2.42	107.01
5	CON	EX10	35.0908	37.8	2.70917	116.012	192.615	309.228	-13.7828		5	CON	EX10	34.4908	37.8	3.30916	6	94.34	17.58	112.19	-1.4	136.82
5	CON	EX15	35.4617	37.9	2.43833	84.8847	218.432	303.877	-15.118		5	CON	EX15	34.975	37.9	2.925	6	106.05	24.53	130.88	-1.96	147.07
5	CON	EX20	35.6825	38	2.3175	85.5675	230.201	316.358	-15.4745		5	CON	EX20	35	38	3	6	163.82	45.96	210.24	-2.16	154.79
5	CON	EX25	35.7775	38.1	2.3225	97.3557	235.497	333.471	-15.5988		5	CON	EX25	35.1325	38.1083	2.97583	6	195.55	44.89	240.99	-1.14	157
5	CON	EX30	35.7125	38.2667	2.55417	98.9256	243.413	342.982	-16.0157		5	CON	EX30	35.2083	38.2	2.99167	6.5	217.97	44.38	262.97	-0.82	162.82
5	CON	EX35	35.7792	38.4	2.62083	100.802	245.658	347.113	-15.8203		5	CON	EX35	35.0725	38.3	3.2275	6.5	211.21	42.32	254.13	-1.11	162.01
5	CON	EX40	35.655	38.5	2.845	110.046	250.619	361.357	-16.044		5	CON	EX40	35.0442	38.3	3.25583	6.5	206.63	37.75	244.99	-0.61	168.93
5	CON	EX45	35.6025	38.6083	3.00583	127.688	249.751	378.154	-15.6693		5	CON	EX45	35.1833	38.25	3.06667	7	227.56	55.5	283.76	-1.27	181.48
5	CON	EX50	35.8475	38.8	2.9525	139.833	257.589	398.176	-15.9938		5	CON	EX50	35.1717	38.4	3.22833	7	234.5	67.09	302.3	-2.23	174.8
5	CON	EX55	35.8158	38.975	3.15917	134.026	272.717	407.518	-17.594		5	CON	EX55	35.1667	38.5	3.33333	7	229.17	66.58	296.45	-2.16	176.3
5	CON	EX60	35.51	39.1	3.59	148.117	268.796	417.698	-17.0762		5	CON	EX60	35.28	38.6	3.32	7	226.46	66.17	293.4	-2.44	170.58
6	CON	COOL0	33.9975	37.2	3.2025	0	0	0	0		6	CON	COOL0	34.4183	37.4	2.98167	5	0	0	0	0	27.6375
6	CON	COOL30	34.065	37.3	3.235	101.449	3.45167	105.149	2.71729		6	CON	COOL30	34.4583	37.5	3.04167	5	119.456	3.24365	122.987	1.37927	69.9198
6	CON	EX0	34.09	37.3	3.21	145.802	43.8045	190.075	0.625938		6	CON	EX0	33.7183	37.3	3.58167	5.5	-5.44229	-18.2816	-23.7545	-0.955417	47.5995
6	CON	EX05	33.9333	37.3	3.36667	74.4339	38.5589	113.238	-1.10172		6	CON	EX05	33.7917	37.3417	3.55	5.5	-77.7445	67.5624	-10.2784	-10.7519	93.432
6	CON	EX10	34.4725	37.3	2.8275	119.964	53.3336	173.693	-1.4875		6	CON	EX10	34.2258	37.4	3.17417	6	-53.2423	95.2082	41.9863	-13.1259	99.9653
6	CON	EX15	34.7008	37.325	2.62417	122.662	54.9955	178.072	-1.62443		6	CON	EX15	34.8533	37.5	2.64667	6	-61.6701	156.792	95.2086	-19.1697	103.132
6	CON	EX20	34.9725	37.4	2.4275	140.961	58.807	200.26	-1.32234		6	CON	EX20	35.2292	37.6	2.37083	6	-58.7007	161.396	102.808	-19.3614	108.704
6	CON	EX25	34.9975	37.5	2.5025	148.046	62.0681	210.627	-1.31552		6	CON	EX25	35.4333	37.7	2.26667	5.5	-47.0806	169.34	122.369	-19.6227	111.499
6	CON	EX30	35.135	37.5	2.365	165.655	65.1945	231.403	-1.21682		6	CON	EX30	35.4425	37.8	2.3575	6	-34.7125	160.439	125.9	-18.7413	111.676
6	CON	EX35	35.2575	37.6	2.3425	178.802	71.9223	251.313	-1.14729		6	CON	EX35	35.4782	37.9	2.42182	6.5	-38.0828	178.244	140.366	-20.6008	113.134
6	CON	EX40	35.2975	37.6	2.3025	183.626	76.8111	261.041	-1.5099		6	CON	EX40	35.4158	38	2.58417	6.5	-24.8744	177.897	153.275	-20.3599	109.864
6	CON	EX45	35.3342	37.7	2.36583	197.783	71.3452	269.793	-0.289948		6	CON	EX45	35.5167	38.1	2.58333	6.5	-16.6579	187.378	171.02	-20.6627	110.778
6	CON	EX50	35.3542	37.8	2.44583	207.521	44.788	252.904	3.00292		6	CON	EX50	35.515	38.2	2.685	6.5	-28.7569	195.126	166.629	-21.3844	112.973
6	CON	EX55	35.6475	37.8	2.1525	214.331	56.208	271.208	1.99922		6	CON	EX55	35.4525	38.3	2.8475	6.5	-25.064	189.479	164.662	-20.7952	112.287
6	CON	EX60	35.5758	37.9	2.32417	206.954	69.9493	277.548	0.227865		6	CON	EX60	35.6208	38.4	2.77916	7	-51.3671	211.791	160.671	-23.638	113.267
7	CON	COOL0	34.8292			0	0	0	0		7	CON	COOL0	34.184	36.5	2.316	4	0	0	0	0	19.32
7	CON	COOL30	35.2875			93.6354	-24.4891	69.2578	5.62625		7	CON	COOL30	34.566	36.6	2.034	5	118.26	-45.38	73.08	5.39	26.47
7	CON	EX0	35.3675			146.74	4.50849	151.512	4.08578		7	CON	EX0	34.553	36.6	2.047	5	92.96	-0.12	93.05	1.1	21.83
7	CON	EX05	35.2125			113.038	17.1199	130.37	2.6676		7	CON	EX05	34.258	36.63	2.372	5.5	-94.27	-4.26	-98.78	-6.51	82.37
7	CON	EX10	35.4067			184.561	27.4274	212.348	1.20969		7	CON	EX10	34.466	36.88	2.414	5.5	-35.87	3.98	-31.95	-6.58	96.6
7	CON	EX15	35.6383			227.617	42.3928	270.535	0.226146		7	CON	EX15	34.667	37.19	2.523	5.5	33.56	6.52	40.15	-4.51	96.29
7	CON	EX20	35.8892			232.865	49.5437	282.973	0.137344		7	CON	EX20	34.748	37.36	2.612	5.5	57.95	19.06	77.15	-4.57	93.93
7	CON	EX25	36.1233			253.177	59.4954	313.285	-0.217552		7	CON	EX25	34.759	37.57	2.811	5.5	86.16	13.93	100.32	-3.92	93.49
7	CON	EX30	36.005			268.36	68.1468	337.169	-0.317396		7	CON	EX30	34.602	37.71	3.108	6	90.89	16.3	107.43	-3.68	94.38
7	CON	EX35	35.96			268.324	84.0201	353.045	-1.68573		7	CON	EX35	34.769	37.9	3.131	6	112.38	9.87	122.52	-2.6	95.14
7	CON	EX40	36.0392			278.201	76.8442	355.757	-0.889271		7	CON	EX40	34.959	38.1	3.141	6	153.46	19	172.81	-1.77	100.44
7	CON	EX45	36.0283			276.605	86.0365	363.378	-1.56557		7	CON	EX45	34.892	38.2	3.308	6	161.97	15.53	177.88	-1.65	107.05
7	CON	EX50	35.9108			281.951	93.6573	376.384	-2.14615		7	CON	EX50	34.649	38.3	3.651	6.5	141.9	11.15	153.4	-1.83	99.56
7	CON	EX55	36.1583			293.236	97.0117	391.041	-1.90734		7	CON	EX55	34.896	38.38	3.484	7	143.8	18.97	163.12	-2.12	104.24
7	CON	EX60	36.1625			307.185	102.399	410.413	-2.20807		7	CON	EX60	34.805	38.4	3.595	7	138.2	6.29	144.84	-1.43	103.52
8	CON	COOL0	34.4342	37.5	3.06583	0	0	0	0		8	CON	COOL0	35.512	37.6	2.088	4	0	0	0	0	70.19
8	CON	COOL30	34.565	37.5	2.935	102.419	71.1707	173.924	-3.72225		8	CON	COOL30	35.7	37.58	1.88	4	342.28	185.96	529.39	-1.51	61.11
8	CON	EX0	34.2775	37.5	3.2225	44.1172	58.0469	102.38	-3.02661		8	CON	EX0	35.334	37.48	2.146	4	167.48	352.35	520.86	-13.9	52.14
8	CON	EX05	34.1342	37.5	3.36583	68.7529	87.1018	156.118	-2.28526		8	CON	EX05	35.584	37.58	1.996	4	54.88	397.59	453.46	-17.4	163.18
8	CON	EX10	34.5133	37.5	2.98667	170.472	131.308	302.377	-8.03109		8	CON	EX10	35.991	37.83	1.839	4	150.53	466.26	618	-17.22	177.64
8	CON	EX15	34.73	37.6	2.87	196.513	168.244	365.466	-11.6069		8	CON	EX15	36.082	38.14	2.058	4	121.87	487.31	610.37	-18.41	180.49
8	CON	EX20	34.8167	37.65	2.83333	210.914	171.474	383.159	-11.8308		8	CON	EX20	36.028	38.4	2.372	4	131.71	505.94	638.87	-20.18	158.82
8	CON	EX25	34.6917	37.7	3.00833	203.255	191.697	395.703	-13.9168		8	CON	EX25	36.086	38.65	2.564	4	148.39	473.9	623.49	-20.66	158.36
8	CON	EX30	34.6042	37.7333	3.12917	204.78	195.743	401.276	-13.8722		8	CON	EX30	35.913	38.8	2.887	5	134.53	486.97	622.73	-21.45	152.49
8	CON	EX35	34.545	37.9	3.355	208.185	195.191	404.16	-13.6976		8	CON	EX35	35.862	38.9	3.038	6	108.41	490.48	600.02	-22.4	151.48
8	CON	EX40	34.53	37.9	3.37	214.872	204.142	419.825	-14.2067		8	CON	EX40	35.881	39	3.119	6	124.16	504.84	630.23	-23.1	147.89
8	CON	EX45	34.2267			204.793	209.909	415.477	-15.0414		8	CON	EX45	36.013	39.1	3.087	6	93.4	472.62	567.08	-23.35	156.3
8	CON	EX50	34.1992			207.29	226.363	434.463	-16.283		8	CON	EX50	36.046	39.1	3.054	7	79.91	486.85	567.8	-25.95	151.79
8	CON	EX55	34.225			217.362	246.232	464.453	-17.3723		8	CON	EX55	36.105	39.1	2.995	7	82.33	482.21	565.62	-25.28	149.05
8	CON	EX60	34.1017			225.456	225.747	452.068	-15.648		8	CON	EX60	35.993	39.2	3.207	5.5	55.29	491.14	547.47	-26.12	153.39
9	CON	COOL0	34.27	37.4	3.13	0	0	0	0		9	CON	COOL0	34.657	37.5	2.843	3.5	0	0	0	0	22.89
9	CON	COOL30	34.5867	37.4167	2.83	69.1367	90.4976	159.941	-3.2938		9	CON	COOL30	35.354	37.4	2.046	4	106.93	-15.06	92.1	0.83	33.67
9	CON	EX0	34.4917	37.5	3.00833	22.8907	77.8076	100.88	-5.46443		9	CON	EX0	34.915	37.5	2.585	4	111.66	-4.25	107.67	-1.56	27.9
9	CON	EX05	34.6467	37.5	2.85333	75.7229	172.102	248.283	-9.75292		9	CON	EX05	34.556	37.5	2.944	4	119.43	-14.71	104.99	-1.47	91.89
9	CON	EX10	35.2425	37.6	2.3575	53.4011	266.341	320.316	-17.0502		9	CON	EX10	35.305	37.6	2.295	4	196.48	-7.9	189.03	-0.53	91.72
9	CON	EX15	35.3367	37.675	2.33833	118.526	181.822	300.911	-11.0673		9	CON	EX15	35.377	37.6	2.223	4	215.45	-4.7	211.26	-0.32	91.71
9	CON	EX20	35.3525	37.7	2.3475	115.679	226.604	342.926	-14.7422		9	CON	EX20	35.339	37.7	2.361	4	240.11	1.47	242.16	-0.23	89.98
9	CON	EX25	35.4475	37.8	2.3525	114.937	226.916	342.487	-15.5611		9	CON	EX25	35.229	37.7	2.471	4	253.79	0.01	254.44	0.16	88.46
9	CON	EX30	35.5175	37.9	2.3825	137.3	220.162	358.103	-14.4827		9	CON	EX30	35.138	37.8	2.662	5	267.53	-1.88	266.29	0.81	86.68
9	CON	EX35	35.5075	38	2.4925	140.942	258.8	400.469	-15.7322		9	CON	EX35	35.329	37.8	2.471	5	286.67	-1.53	285.85	1.43	85
9	CON	EX40	35.5017	38.1	2.59833	148.652	279.654	429.06	-17.4528		9	CON	EX40	35.09	37.8	2.71	5	290.36	1.63	292.71	1.23	82.81
9	CON	EX45	35.6525	38.2	2.5475	166.116	260.223	427.095	-15.9215		9	CON	EX45	35.265	37.9	2.635	5	300.59	-5.66	295.65	1.88	80.29
9	CON	EX50	35.6375	38.3167	2.67917	162.073	272.045	434.906	-16.5861		9	CON	EX50	35.179	37.9	2.721	5	297	-4.6	293.15	2.13	75.13
9	CON	EX55	35.4133	38.4583	3.045	142.192	288.012	430.977	-18.3993		9	CON	EX55	35.261	37.9	2.639	5	293.63	-2.34	292.02	1.57	80.76
9	CON	EX60	35.6083	38.6	2.99167	162.979	289.031	452.824	-17.3099		9	CON	EX60	35.252	37.9	2.648	5	302.32	1.21	304.29	1.43	78.2
10	CON	COOL0	34.2542	37.3	3.04583	0	0	0	0		10	CON	COOL0	34.9075	37.5	2.5925	5.5	0	0	0	0	23.59
10	CON	COOL30	34.865	37.175	2.31	154.531	-5.06719	149.773	0.5625		10	CON	COOL30	35.28	37.5	2.22	5.5	204.76	22.2	227.56	3.39	66.38
10	CON	EX0	34.9667	37.2	2.23333	151.625	29.0356	181.042	-1.3813		10	CON	EX0	35.17	37.5	2.33	5	172.11	65.95	238.63	-3.84	43.13
10	CON	EX05	34.7883	37.2417	2.45333	100.066	173.422	274.008	-11.7915		10	CON	EX05	34.9025	37.5	2.5975	5	69.44	59.2	128.95	-6.56	119.52
10	CON	EX10	35.2575	37.3	2.0425	98.019	204.735	303.31	-14.3883		10	CON	EX10	35.4217	37.6	2.17833	5	75.27	92.39	168	-10.33	123.48
10	CON	EX15	35.4417	37.4	1.95833	72.453	232.981	305.997	-16.9114		10	CON	EX15	35.605	37.7417	2.13667	5	47.67	118.22	166.23	-13.43	124.64
10	CON	EX20	35.6025	37.5333	1.93083	71.9061	256.9	329.385	-17.8982		10	CON	EX20	35.695	37.9	2.205	5	38.75	130.15	169.21	-14.81	120.8
10	CON	EX25	35.7692	37.7	1.93083	78.9906	247.399	326.992	-16.4816		10	CON	EX25	35.5983	38.1	2.50167	4.5	63.95	147.46	211.83	-13.76	121.72
10	CON	EX30	35.79	37.8	2.01	68.3416	271.842	340.804	-18.3103		10	CON	EX30	35.5033	38.3167	2.81333	5	50.37	157.66	208.45	-15.52	131.66
10	CON	EX35	35.8475	38	2.1525	65.0733	282.044	347.725	-18.9658		10	CON	EX35	35.75	38.5333	2.78333	6	38.59	176.86	215.87	-17.28	138.44
10	CON	EX40	35.8925	38.1	2.2075	71.4696	281.748	353.877	-19.3527		10	CON	EX40	35.5425	38.7083	3.16583	6.5	78.67	148.02	227.17	-13.44	143.04
10	CON	EX45	35.785	38.2	2.415	73.4873	288.968	363.098	-20.194		10	CON	EX45	35.6617	38.925	3.26333	7	53.27	162.25	215.96	-15.26	137.41
10	CON	EX50	35.8492	38.3	2.45083	83.7913	284.28	368.73	-19.7699		10	CON	EX50	35.645	39.15	3.505	7	76.72	172.07	249.31	-15.42	146.46
10	CON	EX55	35.9267	38.5	2.57333	89.0394	294.545	384.276	-20.6248		10	CON	EX55	35.8092	39.3333	3.52417	7	136.1	169.87	306.59	-13.53	139.05
10	CON	EX60	36.0725	38.6	2.5275	103.371	294.142	398.236	-20.2119		10	CON	EX60	35.8808	39.4917	3.61083	7.5	137.96	159.31	297.9	-12.96	118.42
11	CON	COOL0	34.44	37.1	2.66	0	0	0	0		11	CON	COOL0	34.019	36.6	2.581	4	0	0	0	0	29.13
11	CON	COOL30	34.8	37.2	2.4	161.964	-26.2166	136.039	3.83771		11	CON	COOL30	34.23	36.5	2.27	4	180.97	-30.81	150.55	2.91	42.52
11	CON	EX0	34.795	37.2	2.405	201.774	51.7678	254.082	1.67885		11	CON	EX0	33.98	36.5	2.52	4	101.17	-29.07	72.3	0.51	29.56
11	CON	EX05	34.855	37.2	2.345	69.0179	136.4	205.805	-2.86958		11	CON	EX05	34.144	36.5	2.356	4	122.44	68.17	191	-5.4	98.64
11	CON	EX10	35.2783	37.4	2.12167	80.1285	170.926	251.51	-3.40193		11	CON	EX10	34.278	36.6	2.322	4	142.75	119.76	263.05	-7.83	106.72
11	CON	EX15	35.515	37.6083	2.09333	77.4605	180.292	258.179	-4.50109		11	CON	EX15	34.639	36.7	2.061	4	162.02	125.07	287.68	-7.78	102.02
11	CON	EX20	35.36	37.9	2.54	92.5631	183.489	276.566	-4.84354		11	CON	EX20	34.865	36.8	1.935	4	157.35	149.09	307.07	-9.9	105.25
11	CON	EX25	35.2833	38.0917	2.80833	111.376	183.287	295.182	-4.79271		11	CON	EX25	34.92	36.9	1.98	4	162.97	170.31	333.97	-11.3	109.45
11	CON	EX30	35.3142	38.3	2.98583	128.432	180.612	309.624	-4.42089		11	CON	EX30	34.879	37.1	2.221	4.5	169.08	179.3	349.13	-12.49	107.64
11	CON	EX35	35.4375	38.5167	3.07917	133.836	188.122	322.565	-4.61536		11	CON	EX35	34.986	37.2	2.214	5	178.99	173.8	353.52	-11.76	114.77
11	CON	EX40	35.4675	38.7083	3.24083	146.237	206.086	352.968	-4.74766		11	CON	EX40	35.11	37.3	2.19	5	205.92	167.81	374.54	-10.78	113.02
11	CON	EX45	35.5575	38.9	3.3425						11	CON	EX45	35.081	37.4	2.319	5.5	218.39	170.39	389.6	-10.58	114.25
11	CON	EX50	35.455	39.1	3.645						11	CON	EX50	35.105	37.5	2.395	5.5	221.61	184.45	406.91	-11.65	120.98
11	CON	EX55	35.4433	39.3	3.85667						11	CON	EX55	35.163	37.6	2.437	6	199.33	230.15	430.34	-16.02	121.05
11	CON	EX60	35.6275	39.5	3.8725						11	CON	EX60	35.189	37.7	2.511	6	209.38	244.43	454.71	-15.97	115.6
1	CWI	COOL0	34.15	37.3	3.15	0	0	0	0		1	CWI	COOL0	35.042	37.5	2.458	6	0	0	0	0	18.61
1	CWI	COOL30	31.5383	37.3	5.76167	-92.2545	-76.5166	-169.148	4.22266		1	CWI	COOL30	32.259	37.7	5.441	3	-59.75	-83.44	-143.44	8.47	4.64
1	CWI	EX0	33.6783	37.2	3.52167	-9.07979	-19.6446	-28.8035	1.05141		1	CWI	EX0	33.743	37.7	3.957	3.5	-102.06	-12.12	-114.46	4.47	7.09
1	CWI	EX05	34.02	37.3	3.28	-102.21	21.0638	-81.3563	-6.64443		1	CWI	EX05	33.985	37.6	3.615	3	-181.63	137.91	-43.95	-9.3	31.64
1	CWI	EX10	34.3083	37.4	3.09167	-24.838	41.1691	16.3354	-6.13563		1	CWI	EX10	34.339	37.6	3.261	3.5	-121.14	150.53	29.3	-11.24	46.36
1	CWI	EX15	35.255	37.5	2.245	19.8298	50.8591	70.7741	-6.3324		1	CWI	EX15	34.934	37.6	2.666	4	-36.44	164.42	128.12	-15.86	54.16
1	CWI	EX20	35.3233	37.6	2.27667	46.4969	59.4225	106.136	-6.49911		1	CWI	EX20	34.962	37.7	2.738	4	-27.01	196.86	170.07	-20.41	58.75
1	CWI	EX25	35.3175	37.7917	2.47417	64.2224	63.301	127.8	-6.29818		1	CWI	EX25	35.193	37.8	2.607	3	11.01	187.01	198.37	-19.29	59.24
1	CWI	EX30	35.36	37.8917	2.53167	88.5314	62.684	151.543	-5.79526		1	CWI	EX30	35.218	37.9	2.682	4.5	42.19	180.43	223.01	-17.69	60.5
1	CWI	EX35	35.1867	37.925	2.73833	117.966	62.7799	181.103	-4.76698		1	CWI	EX35	35.255	38	2.745	4.5	61.66	192.28	254.44	-18.28	62.45
1	CWI	EX40	35.2925	38.025	2.7325	138.851	66.9232	206.164	-4.50182		1	CWI	EX40	35.349	38.1	2.751	4.5	92.12	187.08	279.74	-16.49	58.84
1	CWI	EX45	35.41	38.1	2.69	155.59	74.9877	231.064	-4.89245		1	CWI	EX45	35.364	38.2	2.836	5	113.32	182.42	296.33	-14.85	60.15
1	CWI	EX50	35.48	38.2	2.72	174.422	77.7007	252.681	-4.26922		1	CWI	EX50	35.371	38.3	2.929	4.5	106.79	205.09	312.5	-17.73	60.69
1	CWI	EX55	35.545	38.3	2.755	181.779	85.0602	267.425	-4.75125		1	CWI	EX55	35.514	38.3	2.786	5	136.67	189.13	326.46	-15.58	56.31
1	CWI	EX60	35.5575	38.4	2.8425	184.981	87.3054	272.88	-4.54969		1	CWI	EX60	35.518	38.4	2.882	5	116.9	219.1	336.65	-18.82	57.7
2	CWI	COOL0	34.9417	37.5	2.55833	0	0	0	0		2	CWI	COOL0	34.8108	37.1	2.28917	4	0	0	0	0	15.21
2	CWI	COOL30	32.2042	37.5167	5.3125	32.2252	-20.8831	11.3944	4.84203		2	CWI	COOL30	30.8633	37.1	6.23667	3.5	12.25	-96.26	-84.04	12.4	4.82
2	CWI	EX0	33.4142	37.5	4.08583	-21.1658	82.7584	61.6334	-2.70938		2	CWI	EX0	32.5033	37.1	4.59667	3	-59.83	-1.49	-61.46	-0.1	3.97
2	CWI	EX05	33.64	37.4	3.76	-65.7836	146.02	80.2796	-8.01802		2	CWI	EX05	32.3758	37.1	4.72416	2.5	-124.64	243.22	118.68	-25.57	41.99
2	CWI	EX10	34.1983	37.3	3.10167	-15.4323	164.89	149.695	-9.57276		2	CWI	EX10	32.8158	37.1	4.28417	2.5	-60.75	201.25	140.74	-23.41	47.68
2	CWI	EX15	34.3975	37.4	3.0025	35.6686	185.2	221.194	-11.1451		2	CWI	EX15	33.3283	37.1667	3.83834	2.5	-46.91	218.62	171.99	-26.14	46.03
2	CWI	EX20	34.4983	37.5	3.00167	89.2757	164.903	254.62	-9.57109		2	CWI	EX20	33.7067	37.2667	3.56	2.5	-26.11	220.51	194.73	-26.22	46.98
2	CWI	EX25	34.9725	37.6	2.6275	100.723	189.237	290.485	-10.7028		2	CWI	EX25	34.0883	37.3	3.21167	4	-0.86	235.08	234.67	-26.59	45.24
2	CWI	EX30	35.1692	37.6083	2.43917	106.166	215.574	322.297	-12.2512		2	CWI	EX30	34.3392	37.4083	3.06916	4	18.08	236.78	255.32	-26.57	46.05
2	CWI	EX35	35.08	37.775	2.695	151.772	190.406	342.796	-9.80182		2	CWI	EX35	34.6267	37.525	2.89833	4	46.15	229.26	275.91	-24.96	45.1
2	CWI	EX40	35.08	37.8083	2.72833	148.49	201.29	350.403	-10.7804		2	CWI	EX40	34.8483	37.6	2.75167	4	69.8	221.15	291.5	-23.42	44.75
2	CWI	EX45	34.8758	37.9	3.02417	162.152	201.422	364.242	-10.6809		2	CWI	EX45	34.8583	37.7	2.84167	4.5	78.86	227.18	306.64	-23.24	43.43
2	CWI	EX50	34.815	38	3.185	154.036	232.364	387.087	-12.3322		2	CWI	EX50	34.8942	37.8	2.90583	4.5	91.89	231	323.51	-24.01	41.97
2	CWI	EX55	34.77	38	3.23	143.76	245.212	389.671	-13.4529		2	CWI	EX55	34.8933	37.9	3.00667	4.5	109.72	231.01	341.42	-23.18	42.61
2	CWI	EX60	34.635	38.1	3.465	160.358	247.777	408.864	-12.8312		2	CWI	EX60	35.0075	38	2.9925	4.5	94.43	261.75	356.82	-27.23	43.79
3	CWI	COOL0	34.465	37.2	2.735	0	0	0	0		3	CWI	COOL0	34.935	37.5	2.565	4	0	0	0	0	18.09
3	CWI	COOL30	31.5775	37.4	5.8225	36.2352	-70.0301	-33.8829	7.32661		3	CWI	COOL30	30.9858	37.5	6.51417	2.5	-4.53	-108.9	-113.6	-0.38	10.26
3	CWI	EX0	33.5883	37.4	3.81167	-17.2874	75.8668	58.6184	-5.0676		3	CWI	EX0	32.835	37.5	4.665	2	-118.09	-73.3	-191.8	-3.27	18.38
3	CWI	EX05	33.9383	37.4	3.46167	-88.1923	104.717	16.3699	-10.0641		3	CWI	EX05	32.8467	37.5	4.65333	2	-244.19	-79.58	-324.5	-7.49	42.61
3	CWI	EX10	33.8075	37.5	3.6925	-52.1367	115.91	63.7602	-9.92531		3	CWI	EX10	33.2892	37.5	4.21084	1.5	-146.26	-74	-220.72	-6.19	46.74
3	CWI	EX15	33.9908	37.6	3.60917	-6.76969	132.125	125.489	-10.5703		3	CWI	EX15	34.0858	37.5	3.41417	1.5	-94.69	-79.24	-174.28	-5.36	54.82
3	CWI	EX20	34.0125	37.6583	3.64583	17.8284	128.81	146.848	-11.6769		3	CWI	EX20	34.8333	37.6	2.76667	2	-13.43	-68.28	-81.84	-3.98	67.92
3	CWI	EX25	33.9325	37.7833	3.85083	20.6493	146.826	167.703	-13.5128		3	CWI	EX25	34.9908	37.73	2.73916	4	38.74	-47.83	-9.05	-3.17	64.02
3	CWI	EX30	33.7975	37.8	4.0025	6.94833	152.803	159.968	-14.7786		3	CWI	EX30	35.1233	37.9	2.77667	4.5	74.07	-37.21	36.97	-2.75	67.66
3	CWI	EX35	33.8525	37.8917	4.03917	43.5023	144.395	188.167	-12.8263		3	CWI	EX35	35.3883	38	2.61167	5	100.89	-30.29	70.77	-3.13	75.48
3	CWI	EX40	33.89	37.976	4.086	41.1352	153.037	194.474	-13.9984		3	CWI	EX40	35.245	38.1	2.855	6	116.5	-31.96	84.76	-2.58	81.84
3	CWI	EX45	33.9675	38.057	4.0895	23.4174	180.926	204.656	-17.6745		3	CWI	EX45	35.2192	38.3	3.08083	6.5	128.18	-30.55	97.83	-1.66	88.51
3	CWI	EX50	33.9875	38.138	4.1505	46.4583	189.575	236.431	-17.6124		3	CWI	EX50	35.2592	38.4	3.14083	7	126.99	-29.91	97.3	-1.24	92.16
3	CWI	EX55	33.9892	38.4	4.41083	47.1576	198.673	246.202	-18.2921		3	CWI	EX55	35.22	38.58	3.36	7.5	144.37	-26.29	118.4	-1.08	97.77
3	CWI	EX60	34.1192	38.5	4.38083	44.216	205.922	250.531	-18.6357		3	CWI	EX60	35.265	38.7	3.435	7	155.58	-25.45	130.46	-0.94	101.69
4	CWI	COOL0	35.045	37.2	2.155	0	0	0	0		4	CWI	COOL0	34.017	37.1	3.083	4	0	0	0	0	20.1606
4	CWI	COOL30	31.7525	37.5	5.7475	135.68	-46.0541	89.8619	9.81162		4	CWI	COOL30	31.35	37.2	5.85	4	-86.6583	31.7841	-55.0018	-3.15234	12.4882
4	CWI	EX0	33.2683	37.3	4.03167	-16.2351	99.242	83.1255	-3.52286		4	CWI	EX0	32.556	37.2	4.644	4	-156.958	45.2591	-111.976	-5.68052	14.2091
4	CWI	EX05	33.805	37.3	3.495	-29.512	121.789	92.4223	-5.35177		4	CWI	EX05	32.475	37.3	4.825	3.5	-248.593	48.4382	-200.649	-9.43167	51.488
4	CWI	EX10	34.0483	37.4	3.35167	31.6964	123.976	155.938	-8.25271		4	CWI	EX10	33.264	37.3	4.036	3.5	-129.819	75.8921	-54.1168	-10.3683	63.3854
4	CWI	EX15	34.9483	37.5	2.55167	80.6314	169.773	250.878	-12.2254		4	CWI	EX15	34.588	37.4	2.812	3.5	-51.9947	112.158	60.2307	-10.3106	74.7219
4	CWI	EX20	35.49	37.6	2.11	84.4235	179.903	264.826	-14.3742		4	CWI	EX20	34.984	37.6	2.616	3.5	-30.6392	124.424	93.8931	-11.2211	83.8029
4	CWI	EX25	35.535	37.7	2.165	105.365	204.271	310.21	-15.2814		4	CWI	EX25	35.109	37.91	2.801	4	13.3635	140.865	154.487	-11.2776	83.8462
4	CWI	EX30	35.6883	37.8	2.11167	133.738	198.768	333.158	-14.9871		4	CWI	EX30	35.174			4	26.8786	146.493	173.648	-11.166	85.7381
4	CWI	EX35	35.8408	37.9333	2.0925	119.995	269.088	389.782	-19.7027		4	CWI	EX35	35.134			4.5	34.3577	125.501	160.148	-9.54448	87.3483
4	CWI	EX40	35.8475	38.1	2.2525	184.204	235.199	420.192	-15.8296		4	CWI	EX40	35.157			4.5	79.4333	124.139	203.969	-8.01246	87.6935
4	CWI	EX45	35.84			159.7	245.649	406.118	-16.8515		4	CWI	EX45	35.076	38.4	3.324	5	67.4295	122.902	190.679	-8.47745	83.5851
4	CWI	EX50	36.0183			199.141	240.296	440.259	-15.6214		4	CWI	EX50	35.075	38.5	3.425	5.5	79.2714	120.856	200.522	-8.24245	79.9784
4	CWI	EX55	36.1683			205.318	269.34	475.57	-16.7997		4	CWI	EX55	35.075	38.73	3.655	5.5	84.3383	118.664	203.411	-8.14948	75.6792
4	CWI	EX60	36.295			199.022	281.454	481.391	-17.0415		4	CWI	EX60	35.086	39	3.914	6	69.8527	116.681	186.882	-8.59119	83.648
5	CWI	COOL0	35.18	37.45	2.27	0	0	0	0		5	CWI	COOL0	34.6467	37.5	2.85333	5	0	0	0	0	24.3105
5	CWI	COOL30	32.0375	37.4667	5.42917	3.4575	17.3926	20.823	1.05698		5	CWI	COOL30	32.1408	37.7	5.55917	4	-48.9979	-23.8512	-72.9858	-0.206979	10.4008
5	CWI	EX0	33.1642	37.7	4.53583	2.16979	134.836	137.202	-6.30953		5	CWI	EX0	33.7708	37.6083	3.8375	4	-87.1324	4.0213	-83.2964	-3.37177	11.6162
5	CWI	EX05	33.365	38	4.635	-104.305	214.949	110.696	-12.5697		5	CWI	EX05	34.3017	37.6	3.29833	4	-92.1467	44.4272	-47.8605	-6.35974	110.026
5	CWI	EX10	33.9433	38	4.05667	-36.3397	229.255	193.137	-13.3028		5	CWI	EX10	34.8158	37.7	2.88417	4	11.1451	50.383	61.6444	-5.25141	128.128
5	CWI	EX15	34.2675	38.1	3.8325	68.396	211.37	280.217	-14.9629		5	CWI	EX15	35.3317	37.8	2.46833	4	80.0784	78.2054	158.638	-6.08635	126.662
5	CWI	EX20	34.7592	38.2	3.44083	149.99	225.921	376.603	-14.8157		5	CWI	EX20	35.32	37.925	2.605	4	102.503	113.035	215.998	-6.94568	133.305
5	CWI	EX25	34.9908	38.35	3.35917	169.997	250.023	420.773	-16.5099		5	CWI	EX25	35.3083	38.1	2.79167	4.5	127.925	145.009	273.5	-7.53385	131.029
5	CWI	EX30	35.0817	38.5	3.41833	204.354	248.91	454.096	-15.706		5	CWI	EX30	35.3558	38.2083	2.8525	5.5	143.499	153.988	298.134	-7.35844	127.273
5	CWI	EX35	35.2158	38.675	3.45917	214.547	269.155	484.587	-16.7794		5	CWI	EX35	35.1425	38.3833	3.24083	6	176.024	155.01	331.76	-6.78979	130.772
5	CWI	EX40	35.24	38.8	3.56	233.195	277.396	511.536	-16.9576		5	CWI	EX40	35.1717	38.5	3.32833	6	189.342	170.427	360.549	-7.44234	129.331
5	CWI	EX45	35.2233	38.9917	3.76833	232.33	297.466	530.749	-18.6579		5	CWI	EX45	35.2375	38.5083	3.27083	6.5	205.25	171.761	377.816	-6.8537	129.803
5	CWI	EX50	35.1117	39.1	3.98833	276.073	291.755	568.85	-16.6803		5	CWI	EX50	35.0475	38.6	3.5525	6.5	216.721	178.071	395.661	-6.87536	125.562
5	CWI	EX55	35.0217	39.2	4.17833	278.908	306.416	586.364	-17.4648		5	CWI	EX55	35.0608	38.7	3.63917	6.5	225.97	177.17	404.028	-6.86177	122.946
5	CWI	EX60	35.1425	39.3333	4.19083	286.443	309.981	597.493	-17.9481		5	CWI	EX60	34.9358	38.8	3.86417	6.5	226.99	168.033	395.872	-6.08667	120.553
6	CWI	COOL0	33.89	37.2	3.31	0	0	0	0		6	CWI	COOL0	34.365	37.4	3.035	5	0	0	0	0	124.689
6	CWI	COOL30	32.465	37.3	4.835	0.272083	-72.0436	-71.8777	5.8263		6	CWI	COOL30	31.3867	37.5	6.11333	3	3.26575	-172.292	-169.214	10.5669	23.6732
6	CWI	EX0	33.485	37.3	3.815	67.7523	11.1633	79.0414	2.25953		6	CWI	EX0	33.0475	37.5	4.4525	3	-100.134	-52.8293	-153.264	0.0406253	17.4536
6	CWI	EX05	33.48	37.3	3.82	-60.5748	-23.2624	-84.0595	-2.5588		6	CWI	EX05	33.1275	37.4583	4.33083	3	-165.146	-59.4696	-225.107	-4.48036	111.346
6	CWI	EX10	33.8967	37.3	3.40333	51.6449	16.6487	68.427	0.0771354		6	CWI	EX10	33.315	37.4	4.085	2.5	-120.975	-18.7601	-140.036	-7.93104	156.936
6	CWI	EX15	34.2275	37.4	3.1725	133.918	16.3796	150.588	1.59635		6	CWI	EX15	33.835	37.5	3.665	2.5	-59.566	47.843	-11.7892	-10.2488	214.169
6	CWI	EX20	34.4125	37.475	3.0625	169.83	12.6997	182.865	2.99484		6	CWI	EX20	34.6925	37.5	2.8075	2	-34.2292	89.1031	54.9404	-13.1218	212.501
6	CWI	EX25	34.4883	37.5	3.01167	186.281	19.1745	205.887	3.07469		6	CWI	EX25	34.845	37.6	2.755	4	-8.11719	92.3042	84.3318	-12.3391	208.291
6	CWI	EX30	34.6875	37.6	2.9125	213.601	38.54	252.698	1.89589		6	CWI	EX30	34.9067	37.7	2.79333	4	12.0336	99.1454	111.399	-12.4496	194.357
6	CWI	EX35	34.7517	37.6	2.84833	208.639	40.3458	249.517	1.9488		6	CWI	EX35	34.9542	37.8	2.84583	5	27.9337	103.187	131.399	-12.6852	189.876
6	CWI	EX40	34.7675	37.7	2.9325	222.254	36.9778	259.81	2.70583		6	CWI	EX40	34.93	37.9	2.97	5.5	48.5602	117.915	166.827	-13.3387	185.482
6	CWI	EX45	34.84	37.7	2.86	232.353	49.1409	282.111	2.09016		6	CWI	EX45	34.8833	38	3.11667	6	60.7814	121.039	182.216	-14.1026	183.969
6	CWI	EX50	34.8825	37.8	2.9175	243.244	51.2088	295.086	2.25917		6	CWI	EX50	35.0292	38.1	3.07083	6	66.5974	124.745	191.732	-14.2718	181.616
6	CWI	EX55	34.995	37.8	2.805	234.762	55.9953	291.406	1.4987		6	CWI	EX55	34.9525	38.2	3.2475	5.5	64.7351	141.733	206.905	-15.797	180.285
6	CWI	EX60	35.0867	37.8	2.71333	235.04	60.6336	296.322	1.41219		6	CWI	EX60	35.0983	38.2	3.10167	6	73.5984	140.694	214.712	-14.9853	177.746
7	CWI	COOL0	34.7158			0	0	0	0		7	CWI	COOL0	34.656	36.6	1.944	4.5	0	0	0	0	12.03
7	CWI	COOL30	30.8033			112.639	-23.2971	89.5963	6.97068		7	CWI	COOL30	31.964	36.9	4.936	2	-232.59	-180.32	-413.72	5.92	14.09
7	CWI	EX0	32.3575			23.9748	24.267	48.3957	1.72646		7	CWI	EX0	33.189	37	3.811	2	-84.49	-24.12	-108.79	-0.15	12.17
7	CWI	EX05	32.19			-33.2739	41.8274	8.60411	-0.463854		7	CWI	EX05	33.204	37	3.796	2	-339.65	39.48	-300.86	-9.07	56.3
7	CWI	EX10	32.475			12.2423	42.3703	54.7664	-2.18115		7	CWI	EX10	33.495	37.19	3.695	2	-262.92	85.9	-177.42	-8.67	55.06
7	CWI	EX15	32.8475			-2.82953	25.8645	23.1546	-2.86844		7	CWI	EX15	33.96	37.38	3.42	2	-173.54	171.43	-2.24	-7.2	63.39
7	CWI	EX20	33.2708			30.1732	11.318	41.629	-1.84526		7	CWI	EX20	34.125	37.6	3.475	2	-3.86	156.58	153.03	-6.95	68.39
7	CWI	EX25	33.8358			81.3643	10.6662	92.2952	-0.906302		7	CWI	EX25	34.143	37.81	3.667	4	55.55	227.2	283.31	-7.02	68.39
7	CWI	EX30	34.165			115.961	14.6365	130.942	-0.66		7	CWI	EX30	34.163	37.99	3.827	4	156.3	239.45	396.57	-7.4	64.4
7	CWI	EX35	34.44			139.328	16.4894	156.273	-0.456406		7	CWI	EX35	34.571	38.19	3.619	5					68.77
7	CWI	EX40	34.7217			171.746	16.1327	188.38	0.15099		7	CWI	EX40	34.649	38.31	3.661	6					67.49
7	CWI	EX45	34.8392			201.127	23.0714	224.8	0.573021		7	CWI	EX45	34.67	38.51	3.84	6.5					68.66
7	CWI	EX50	34.9725			217.971	24.5228	243.138	1.03615		7	CWI	EX50	34.802	38.67	3.868	6.5					69.38
7	CWI	EX55	34.9975			232.397	29.8604	262.99	0.859323		7	CWI	EX55	34.905	38.93	4.025	7					70.14
7	CWI	EX60	34.9233			242.341	33.0755	276.142	0.953698		7	CWI	EX60	34.86	39.04	4.18	7					70.82
8	CWI	COOL0	34.9167	37.2	2.28333	0	0	0	0		8	CWI	COOL0	35.315	37.6	2.285	5	0	0	0	0	52.7635
8	CWI	COOL30	31.5717	37.4083	5.83667	36.7282	-94.3227	-57.6547	9.96255		8	CWI	COOL30	32.6733	37.8	5.12667	3	-83.7349	78.8162	-5.00417	0.102031	22.996
8	CWI	EX0	33	37.4	4.4	-8.46698	-2.70443	-11.2617	-0.614271		8	CWI	EX0	34.7	37.4417	2.74167	3	-250.718	94.6506	-156.5	-6.18328	37.6143
8	CWI	EX05	33.6567	37.3	3.64333	-48.667	34.5551	-14.1928	-1.97432		8	CWI	EX05	35.7758	37.4083	1.6325	3	-309.316	261.641	-47.9944	-15.1717	104.358
8	CWI	EX10	34.0817	37.4	3.31833	20.6983	72.6223	93.4592	-3.92021		8	CWI	EX10	36.3225	37.775	1.4525	3	-174.996	292.209	117.28	-20.943	117.887
8	CWI	EX15	34.155	37.4	3.245	122.888	76.9001	200.159	-3.72911		8	CWI	EX15	36.3775	38.0667	1.68917	3	-135.471	309.766	174.477	-22.8343	130.345
8	CWI	EX20	33.9075			141.79	108.977	251.232	-5.53802		8	CWI	EX20	36.5108	38.3	1.78917	3.5	-95.8716	285.455	189.85	-22.7891	135.587
8	CWI	EX25	33.6417			166.123	121.944	288.617	-5.63146		8	CWI	EX25	36.4617	38.5083	2.04667	4	-126.47	299.842	173.585	-26.3305	126.705
8	CWI	EX30	33.8825			158.217	150.101	308.89	-7.94172		8	CWI	EX30	36.53	38.7	2.17	5	-104.428	272.386	168.18	-25.2978	121.603
8	CWI	EX35	33.2967			204.408	113.999	319.021	-4.33182		8	CWI	EX35	36.3775	38.8	2.4225	6	-139.584	296.954	157.519	-29.8177	163.841
8	CWI	EX40	33.4517			189.731	163.204	353.615	-8.09385		8	CWI	EX40	36.3308	38.9	2.56917	6	-130.087	297.064	167.193	-30.8314	191.195
8	CWI	EX45	33.2592			234.163	139.376	374.275	-5.66266		8	CWI	EX45	35.77	39	3.23	5.5	-117.332	289.217	172.1	-31.1898	208.705
8	CWI	EX50	33.1925			238.578	161.303	400.672	-7.2563		8	CWI	EX50	35.6533	39.1	3.44667	6	-133.991	332.175	198.45	-32.2126	235.429
8	CWI	EX55	33.1833			268.254	152.545	421.644	-5.91068		8	CWI	EX55	35.6225	39.1	3.4775	6	-125.011	334.653	209.82	-32.4677	243.476
8	CWI	EX60	33.115			275.494	168.064	444.44	-6.35755		8	CWI	EX60	35.6225	39.1	3.4775	6	-89.0502	324.121	235.412	-31.1478	233.394
9	CWI	COOL0	34.61	37.2	2.59	0	0	0	0		9	CWI	COOL0	34.924	37.2	2.276	3.5	0	0	0	0	27.21
9	CWI	COOL30	31.8167	37.4	5.58333	85.5298	-44.9379	40.7216	6.6325		9	CWI	COOL30	32.217	37.4	5.183	2.5	-138.11	-28.98	-167.5	-1.86	12.69
9	CWI	EX0	33.2775	37.4	4.1225	144.542	44.178	189.101	0.511875		9	CWI	EX0	33.706	37.5	3.794	2.5	-85.6	40.29	-45.44	-6.04	20.25
9	CWI	EX05	33.7058	37.4	3.69417	19.7437	55.1524	75.0303	-2.92359		9	CWI	EX05	34.015	37.5	3.485	2.5	-197.38	7.66	-190.16	-8.33	67.47
9	CWI	EX10	34.2217	37.4	3.17833	180.813	91.1343	272.515	-3.96656		9	CWI	EX10	34.595	37.6	3.005	2.5	-71.95	12.26	-59.83	-2.62	109.85
9	CWI	EX15	34.7492	37.4333	2.68417	243.151	109.401	353.275	-2.15776		9	CWI	EX15	34.763	37.6	2.837	2.5	-2.67	29.67	27.05	-1.64	128.16
9	CWI	EX20	34.8483	37.5	2.65167	263.832	136.599	401.264	-3.28953		9	CWI	EX20	34.865	37.7	2.835	2.5	41.8	35.74	77.7	-1.09	121.95
9	CWI	EX25	35.06	37.6	2.54	279.711	141.043	421.608	-3.79854		9	CWI	EX25	34.768	37.7	2.932	2.5	89.08	37.18	126.57	-0.52	115.64
9	CWI	EX30	35.1092	37.6	2.49083	317.747	137.839	456.535	-2.89672		9	CWI	EX30	34.57	37.7	3.13	3	114.71	32.85	147.86	0.29	114.2
9	CWI	EX35	35.1317	37.7	2.56833	333.237	142.577	476.82	-3.60203		9	CWI	EX35	34.866	37.7	2.834	3.5	160.18	36.94	197.57	0.76	106.74
9	CWI	EX40	35.2225	37.8	2.5775	349.187	145.231	495.458	-3.61224		9	CWI	EX40	34.671	37.7	3.029	4	200.46	34.98	235.99	1.92	104.85
9	CWI	EX45	35.135	37.8417	2.70667	346.999	157.864	505.929	-4.70125		9	CWI	EX45	34.718	37.7	2.982	4	208.23	36.31	245.14	1.92	99.33
9	CWI	EX50	35.3625	37.9	2.5375	346.824	160.632	508.515	-4.81896		9	CWI	EX50	34.751	37.7	2.949	4	220.09	40.12	260.83	1.81	98.84
9	CWI	EX55	35.3208	38	2.67917	349.386	160.535	510.983	-4.7988		9	CWI	EX55	34.851	37.7	2.849	4.5	224.21	43.01	267.85	1.58	99.3
9	CWI	EX60	35.3775	38.1	2.7225	340.634	171.168	512.865	-5.97073		9	CWI	EX60	34.97	37.7	2.73	4.5	216.36	43.84	260.81	1.44	97.75
10	CWI	COOL0	34.4567	37.2	2.74333	0	0	0	0		10	CWI	COOL0	34.964	37.2	2.236	4	0	0	0	0	71.47
10	CWI	COOL30	32.39	37.1917	4.80167	76.4021	-103.204	-26.7773	9.21672		10	CWI	COOL30	32.394	37.4	5.006	3	-121.48	-96.24	-218.18	0.85	26.45
10	CWI	EX0	33.5333	37.2	3.66667	36.3564	-19.991	16.3923	-1.57156		10	CWI	EX0	33.739	37.4	3.661	3	-140.5	-25.2	-166.05	-5.83	26.61
10	CWI	EX05	34.0833	37.3	3.21667	-55.3398	172.139	116.893	-19.0389		10	CWI	EX05	34.31	37.4	3.09	3	-227.02	-56.44	-284.09	-7.26	148.37
10	CWI	EX10	34.6967	37.3667	2.67	-36.2472	210.563	174.557	-23.2844		10	CWI	EX10	35.007	37.4	2.393	3	-106.09	-24.66	-131.02	-10.75	192.08
10	CWI	EX15	35.3567	37.5	2.14333	-10.6918	221.067	210.669	-24.7598		10	CWI	EX15	35.231	37.5	2.269	3	10.7	37.5	48.31	-12.47	204.89
10	CWI	EX20	35.615	37.6	1.985	-6.76203	241.848	235.418	-27.7307		10	CWI	EX20	35.173	37.6	2.427	3	27.52	87.51	115.27	-16.07	193.61
10	CWI	EX25	35.7075	37.8	2.0925	31.7306	219.759	251.882	-24.1664		10	CWI	EX25	35.202	37.77	2.568	4	101.92	94.31	196.66	-14.3	168.59
10	CWI	EX30	35.7575	37.8167	2.05917	12.1783	255.833	268.446	-28.2141		10	CWI	EX30	35.079	37.9	2.821	5	125.55	89.32	215.37	-15.43	158.51
10	CWI	EX35	35.8125	37.95	2.1375	30.7205	251.44	282.668	-27.3031		10	CWI	EX35	35.104	38.2	3.096	5	98	128.77	227.26	-16.02	159.26
10	CWI	EX40	35.7075	38.1	2.3925	28.8425	272.145	301.493	-29.1894		10	CWI	EX40	35.096	38.65	3.554	6	100.05	180.43	281.07	-16.15	169.44
10	CWI	EX45	35.8125	38.2	2.3875	16.0022	300.502	317.03	-32.4698		10	CWI	EX45	35.157	38.79	3.633	6	178.94	173.1	352.8	-15.9	172.42
10	CWI	EX50	35.9	38.3083	2.40833	8.66141	318.239	327.467	-33.9455		10	CWI	EX50	35.2			6.5	210.4	212.54	423.8	-18.08	164.58
10	CWI	EX55	35.8008	38.5	2.69917	16.802	317.968	335.319	-32.9833		10	CWI	EX55	35.31			7	238.07	222.08	461.06	-16.88	166.54
10	CWI	EX60	35.9658	38.6	2.63417	7.64729	337.964	346.187	-34.5748		10	CWI	EX60	35.244	39.1	3.856	7	234.73	225.32	460.96	-16.06	165.85
11	CWI	COOL0	34.66	37.3	2.64	0	0	0	0		11	CWI	COOL0	34.259	37	2.741	4	0	0	0	0	26.51
11	CWI	COOL30	32.2783	37.4	5.12167	-34.1678	-85.1854	-119.535	7.38885		11	CWI	COOL30	31.24	37	5.76	3.5	-81.32	-139.15	-220.9	6.21	19.71
11	CWI	EX0	33.6158	37.4	3.78417	-124.226	38.4535	-85.9736	-0.318802		11	CWI	EX0	32.907	36.8	3.893	3	-114.01	-24.02	-138.36	-1.3	15.9
11	CWI	EX05	34.5442	37.4	2.85583	-185.6	117.64	-68.1168	-7.02786		11	CWI	EX05	33.12	36.8	3.68	3	-217.02	27.89	-189.57	-5.56	76.9
11	CWI	EX10	35.2167	37.5	2.28333	-86.1379	117.717	31.5594	-7.54891		11	CWI	EX10	33.513	36.8	3.287	3	-145.16	44.03	-101.4	-5.99	83.84
11	CWI	EX15	35.5492	37.775	2.22583	-60.1328	139.542	79.4955	-8.48031		11	CWI	EX15	33.831	36.8	2.969	2.5	-70.33	72.67	2.3	-9.63	119.22
11	CWI	EX20	35.4958	38.0083	2.5125	-45.8779	151.557	105.815	-9.52479		11	CWI	EX20	34.347	36.95	2.603	2.5	-11.72	114.87	103.29	-13.62	125.68
11	CWI	EX25	35.29	38.3	3.01	-20.6051	161.376	140.981	-9.94406		11	CWI	EX25	34.653	37.11	2.457	3.5	72.2	128.24	200.81	-12.43	133.02
11	CWI	EX30	35.365	38.5	3.135	-9.76958	180.33	170.849	-10.8002		11	CWI	EX30	34.874	37.3	2.426	4	106.06	151.47	258.02	-13.63	134.1
11	CWI	EX35	35.4308	38.7083	3.2775	9.30953	181.058	190.705	-11.3415		11	CWI	EX35	35.065	37.5	2.435	4.5	136.76	168.64	306	-14.6	138.3
11	CWI	EX40	35.385	38.9	3.515	7.52849	195.709	203.559	-12.2051		11	CWI	EX40	35.005	37.67	2.665	4.5	135.92	195.26	331.84	-17.23	136.25
11	CWI	EX45	35.4167	39.1	3.68333	10.2709	203.995	214.577	-12.9683		11	CWI	EX45	35.122	37.8	2.678	5	134.24	202.96	337.88	-18.49	135.3
11	CWI	EX50	35.17	39.3	4.13	0.94375	206.818	208.145	-13.2578		11	CWI	EX50	34.797	37.9	3.103	5	156.73	188.28	345.73	-16.57	125.95
11	CWI	EX55	35.4858	39.4417	3.95583	24.9262	207.346	232.698	-13.3739		11	CWI	EX55	34.561	38	3.439	5	189.51	174.34	364.59	-14.86	120.72
11	CWI	EX60	35.5392	39.6	4.06083	24.3143	213.051	237.813	-13.351		11	CWI	EX60	34.788	38.1	3.312	5.5	167.62	212.25	380.64	-18.84	116.81
1	ICE	COOL0	34.3833	37.1	2.71667	0	0	0	0		1	ICE	COOL0	34.78	37.2	2.42	4	0	0	0	0	15.77
1	ICE	COOL30	34.75	36.9	2.15	38.1096	-4.38651	33.7405	2.42432		1	ICE	COOL30	35.03	37	1.97	4	-19.49	68.08	48.65	-7.06	10.89
1	ICE	EX0	34.8417	36.8	1.95833	60.8231	-7.34292	53.5648	3.88964		1	ICE	EX0	35.2033	36.9	1.69667	3.5	-113.3	71.23	-42.24	-11.56	14.11
1	ICE	EX05	34.7958	36.9	2.10417	-9.86865	36.8659	26.9827	-3.95594		1	ICE	EX05	34.9892	36.9667	1.9775	3.5	-257.18	248.16	-9.23	-32.82	43.92
1	ICE	EX10	35.1225	37	1.8775	53.7905	65.1833	119.2	-5.68286		1	ICE	EX10	35.085	37.1	2.015	3.5	-165.58	254.81	89.21	-30.48	59.77
1	ICE	EX15	35.3792	37.1917	1.8125	58.8885	77.7904	136.942	-6.93641		1	ICE	EX15	35.0725	37.3	2.2275	3	-126.35	241.39	115.11	-28.2	62.55
1	ICE	EX20	35.5325	37.3583	1.82583	67.7321	86.4516	154.493	-7.46052		1	ICE	EX20	35.195	37.5	2.305	3	-120.35	253.97	133.73	-29.18	62.97
1	ICE	EX25	35.6467	37.5	1.85333	77.309	92.2186	169.877	-7.62833		1	ICE	EX25	35.1883	37.7	2.51167	3.5	-69.84	224.9	155.22	-24.64	61.03
1	ICE	EX30	35.6675	37.7	2.0325	89.9691	96.4548	186.822	-7.65875		1	ICE	EX30	35.08	37.8583	2.77833	5	-83.07	240.79	157.86	-26.05	64.25
1	ICE	EX35	35.75	37.8833	2.13333	101.312	103.756	205.479	-8.05339		1	ICE	EX35	35.1742	38	2.82583	5	-59.51	266.78	207.53	-27.14	65.93
1	ICE	EX40	35.7725	38.0167	2.24417	116.045	107.536	224.048	-7.85578		1	ICE	EX40	35.2358	38.175	2.93917	5	-16.71	250.27	233.9	-24.35	67.41
1	ICE	EX45	35.8775	38.2	2.3225	132.471	107.368	240.301	-7.47073		1	ICE	EX45	35.1408	38.2833	3.1425	4.5	-19.71	281.33	262.02	-26.04	70.12
1	ICE	EX50	35.9975	38.2	2.2025	141.708	108.69	250.859	-7.40667		1	ICE	EX50	35.2575	38.3	3.0425	4.5	-7.69	296.06	288.84	-25.92	71.13
1	ICE	EX55	36.0933	38.3	2.20667	150.483	116.699	267.664	-8.05125		1	ICE	EX55	35.2625	38.4	3.1375	4	23.06	293.67	317.27	-23.95	65.65
1	ICE	EX60	36.105	38.25	2.145	158.566	125.962	285.076	-8.47964		1	ICE	EX60	35.2825	38.4167	3.13417	4.5	35.71	292.83	329.11	-23.52	65.28
2	ICE	COOL0	34.9567	37.1	2.14333	0	0	0	0		2	ICE	COOL0	34.47	37.2	2.73	4	0	0	0	0	51.3442
2	ICE	COOL30	35.2492	36.9	1.65083	6.64828	-49.3578	-42.8026	2.80531		2	ICE	COOL30	34.7833	36.9	2.11667	4	148.654	-30.8221	118.133	7.99099	30.4672
2	ICE	EX0	35.29	36.9	1.61	39.5967	-95.7953	-56.3186	4.92609		2	ICE	EX0	34.8175	36.8917	2.07417	4	27.0271	-29.5208	-2.48099	5.47151	33.2704
2	ICE	EX05	35	37	2	44.3243	111.166	155.705	-1.54359		2	ICE	EX05	34.6383	36.9	2.26167	4	89.9425	55.7058	145.931	-2.43203	118.361
2	ICE	EX10	35.24	37.175	1.935	58.431	153.605	212.345	-3.93031		2	ICE	EX10	35.0317	37	1.96833	4	99.7423	98.1359	198.222	-6.42089	126.734
2	ICE	EX15	35.2167	37.3	2.08333	55.546	183.235	239.146	-5.61667		2	ICE	EX15	35.32	37.1083	1.78833	3.5	28.2533	230.757	259.444	-23.1089	109.229
2	ICE	EX20	35.035	37.4	2.365	71.7604	201.194	273.373	-6.36141		2	ICE	EX20	35.2825	37.3	2.0175	3.5	129.907	143.341	273.783	-8.91417	118.989
2	ICE	EX25	35.03	37.5333	2.50333	65.7079	222.962	289.102	-9.02375		2	ICE	EX25	35.4183	37.5	2.08167	4	186.097	51.7637	238.353	-0.318698	113.556
2	ICE	EX30	34.9783	37.675	2.69667	73.9482	215.773	290.178	-7.77646		2	ICE	EX30	35.5417	37.6583	2.11667	4	94.1474	250.471	345.226	-22.1537	102.025
2	ICE	EX35	35.15	37.725	2.575	69.6842	227.126	297.281	-8.3862		2	ICE	EX35	35.5558	37.8	2.24417	4	91.8457	244.75	337.18	-21.9983	93.0878
2	ICE	EX40	34.9175	37.8	2.8825	93.607	224.332	318.446	-7.32328		2	ICE	EX40	35.8742	37.9333	2.05917	4.5	108.367	223.387	332.352	-18.8504	90.6022
2	ICE	EX45	35.0483	37.9	2.85167	85.5135	231.864	317.882	-8.59427		2	ICE	EX45	35.82	38.1	2.28	4	161.289	165.979	327.924	-11.5118	89.1419
2	ICE	EX50	35.02	38	2.98	93.0628	230.322	323.929	-8.60964		2	ICE	EX50	35.895	38.3	2.405	4	243.325	65.672	309.687	-0.306719	101.214
2	ICE	EX55	35.0675	38	2.9325	108.726	229.785	339.081	-8.44667		2	ICE	EX55	35.915	38.4	2.485	4.5	123.008	257.135	380.855	-23.0281	97.2182
2	ICE	EX60	35.0525	38.0167	2.96417	109.837	228.737	339.177	-8.31625		2	ICE	EX60	36.165	38.5583	2.39333	4.5	105.414	276.393	382.497	-25.1705	96.9548
3	ICE	COOL0	34.4275	37.15	2.7225	0	0	0	0		3	ICE	COOL0	34.6575	37.6	2.9425	4.5	0	0	0	0	22.6528
3	ICE	COOL30	34.7542	36.9	2.14583	72.9188	27.3821	100.527	0.32526		3	ICE	COOL30	35.36	37.5	2.14	4	35.52	-3.51682	32.0614	2.48182	19.1922
3	ICE	EX0	34.715	36.9	2.185	90.7999	-3.82562	87.1404	5.53135		3	ICE	EX0	35.5333	37.4	1.86666	4	4.46656	-8.54161	-4.08146	1.83641	13.222
3	ICE	EX05	34.3575	37	2.6425	42.9822	109.303	152.541	-7.84026		3	ICE	EX05	35.3767	37.4083	2.03166	4	-6.30943	-30.8717	-37.2452	1.01177	58.0468
3	ICE	EX10	33.8883	37.1	3.21167	57.4637	149.281	207.103	-13.4542		3	ICE	EX10	35.3017	37.5	2.19833	4	44.9635	-8.56172	36.4728	-1.89151	68.9137
3	ICE	EX15	34.0408	37.3	3.25917	58.5775	152.808	211.776	-14.7853		3	ICE	EX15	35.6075	37.6	1.9925	3.5	49.6369	0.775052	50.4813	-2.95557	69.7529
3	ICE	EX20	33.995	37.4083	3.41333	70.1108	171.24	241.803	-17.1635		3	ICE	EX20	35.6818	37.7083	2.02651	3.5	66.3273	10.7763	77.2638	-3.70349	69.8831
3	ICE	EX25	33.9825	37.6	3.6175	71.1256	185.226	256.821	-18.595		3	ICE	EX25	35.7775	37.9	2.1225	4	83.9683	7.85891	92.0052	-3.26729	70.6484
3	ICE	EX30	33.945	37.7167	3.77167	76.8023	194.494	271.795	-19.8591		3	ICE	EX30	35.8325	38	2.1675	5	99.2761	9.91224	109.398	-2.68911	71.3702
3	ICE	EX35	33.9358	37.9	3.96417	104.571	170.947	276.024	-17.2098		3	ICE	EX35	35.7375	38.1	2.3625	6	118.037	23.3497	141.664	-3.88505	69.6728
3	ICE	EX40	34.1425	38	3.8575	118.019	168.378	286.882	-16.827		3	ICE	EX40	35.8642	38.275	2.41083	6.6	130.389	16.5292	147.197	-3.0737	71.3481
3	ICE	EX45	34.1875	38.175	3.9875	116.719	185.304	302.553	-19.1625		3	ICE	EX45	35.68	38.3583	2.67833	7	126.447	14.258	141.003	-3.00865	72.646
3	ICE	EX50	34.305	38.2833	3.97833	148.592	197.252	346.461	-18.9212		3	ICE	EX50	35.4292	38.4333	3.00416	7	132.668	24.9901	157.97	-3.62	72.8002
3	ICE	EX55	34.4133	38.4	3.98667	172.849	185.536	359.059	-16.9651		3	ICE	EX55	35.4925	38.5083	3.01583	7.5	138.571	18.2991	157.182	-2.97052	73.6276
3	ICE	EX60	34.6742	38.5	3.82583	152.624	219.018	372.295	-21.166		3	ICE	EX60	35.3025	38.6	3.2975	7	136.756	23.866	160.947	-3.36333	72.3723
4	ICE	COOL0	35.5625	37.6	2.0375	0	0	0	0		4	ICE	COOL0	34.4708	37.175	2.70417	3.5	0	0	0	0	32.37
4	ICE	COOL30	35.5917	37.3	1.70833	125.023	6.31807	131.592	2.65313		4	ICE	COOL30	34.946	36.81	1.864	3.5	114.64	20.67	135.6	3.47	26.05
4	ICE	EX0	35.6967	37.3	1.60333	261.865	-119.526	142.754	18.1169		4	ICE	EX0	34.845	36.8	1.955	3	71.77	24.26	96.23	1.48	23.04
4	ICE	EX05	35.6008	37.4	1.79917	196.768	91.7099	289.075	-0.312864		4	ICE	EX05	34.434	36.8	2.366	3	-73.98	76.76	2.7	-7.9	68.09
4	ICE	EX10	35.8275	37.6	1.7725	168.044	195.294	364.026	-9.09292		4	ICE	EX10	35.177	36.98	1.803	3	75.39	99.26	175.01	-4.56	72.56
4	ICE	EX15	35.9075	37.75	1.8425	142.644	249.086	392.442	-13.0319		4	ICE	EX15	35.319	37.13	1.811	3	87.08	104.28	191.76	-5.69	83.28
4	ICE	EX20	36.025	37.9	1.875	122.635	260.981	384.308	-15.1376		4	ICE	EX20	35.362	37.39	2.028	3	134.33	142.66	277.54	-7.13	78.53
4	ICE	EX25	36.2325	38	1.7675	85.7735	302.007	388.471	-18.5387		4	ICE	EX25	35.5	37.59	2.09	3	180.25	136.52	317.43	-5.94	86.11
4	ICE	EX30	36.1433	38.3	2.15667	68.1567	325.147	393.997	-21.2405		4	ICE	EX30	35.496	37.8	2.304	4	188.2	146.46	335.38	-5.75	90.44
4	ICE	EX35	36.305	38.5	2.195	4.93615	405.355	410.971	-26.9631		4	ICE	EX35	35.577	38.08	2.503	5	201.82	149.17	351.71	-6.05	94.15
4	ICE	EX40	36.4275	38.6	2.1725	29.6295	379.866	410.209	-25.3869		4	ICE	EX40	35.521	38.35	2.829	5	197.86	142.53	341.12	-5.41	92.91
4	ICE	EX45	36.8017	38.7917	1.99	27.2215	390.736	418.628	-26.3601		4	ICE	EX45	35.678	38.65	2.972	5.5	194.06	145.23	340.01	-6.09	93.18
4	ICE	EX50	36.92	39	2.08	24.4247	405.602	430.75	-27.3903		4	ICE	EX50	35.484			6	217.96	148.21	366.93	-5.87	88.06
4	ICE	EX55	36.9075			40.7932	396.997	438.522	-26.3916		4	ICE	EX55	35.48			6.5	202.94	139.9	343.59	-6.05	71.51
4	ICE	EX60	37	39.3917	2.39167	42.2214	404.249	447.218	-26.9619		4	ICE	EX60	35.34	39	3.66	6.5	202.57	148.36	351.68	-6.52	69.68
5	ICE	COOL0	35.135	37.8	2.665	0	0	0	0		5	ICE	COOL0	34.68	37.4	2.72	5.5	0	0	0	0	11.47
5	ICE	COOL30	35.02	37.8	2.78	94.9152	-24.8317	70.2274	4.6213		5	ICE	COOL30	35.34	37.2	1.86	5.5	143.57	7.62	151.54	4.05	15.49
5	ICE	EX0	35.53	37.6	2.07	86.8498	26.6443	113.704	0.227135		5	ICE	EX0	35.251	37.1	1.849	5	73.4974	8.97401	82.6799	1.13063	8.6427
5	ICE	EX05	35.4242	37.6	2.17583	28.4068	233.709	262.586	-13.2042		5	ICE	EX05	35.258	37.16	1.902	5	134.576	83.7086	218.765	-3.31724	74.3757
5	ICE	EX10	35.555	37.7167	2.16167	119.646	222.42	342.687	-13.919		5	ICE	EX10	35.588	37.34	1.752	5	213.072	96.3847	310.177	-3.28724	84.5741
5	ICE	EX15	35.97	37.9	1.93	152.929	237.065	390.721	-15.871		5	ICE	EX15	35.584	37.54	1.956	5	228.112	109.518	338.39	-4.52245	90.4703
5	ICE	EX20	36.14	38.0583	1.91833	161.972	251.633	414.332	-17.5817		5	ICE	EX20	35.601	37.7	2.099	5	238.777	113.871	353.419	-4.78974	94.0588
5	ICE	EX25	36.1092	38.2167	2.1075	175.018	264.354	440.192	-18.3496		5	ICE	EX25	35.489	37.81	2.321	5.5	239.938	115.367	356.099	-5.23687	94.7784
5	ICE	EX30	36.0917	38.4	2.30833	177.044	280.527	458.366	-19.1722		5	ICE	EX30	35.459	37.93	2.471	6	255.577	113.144	369.54	-4.69516	95.3582
5	ICE	EX35	36.0608	38.5	2.43917	165.693	289.505	456	-20.4105		5	ICE	EX35	35.391	38	2.609	6.5	269.574	126.687	397.14	-5.5851	96.7621
5	ICE	EX40	35.99	38.7	2.71	172.698	306.109	479.636	-21.2286		5	ICE	EX40	35.361	38.1	2.739	6.5	266.922	125.578	393.378	-5.86005	97.7074
5	ICE	EX45	35.9492	38.8	2.85083	151.354	316.4	468.57	-22.4378		5	ICE	EX45	35.329	38.2	2.871	6.5	271.217	123.934	396.036	-5.58484	94.141
5	ICE	EX50	35.8475	38.975	3.1275	150.18	329.129	480.151	-23.4039		5	ICE	EX50	35.319	38.2	2.881	6.5	274.293	130.023	405.159	-6.07146	93.6777
5	ICE	EX55	35.9175	39.1	3.1825	143.485	336.056	480.352	-24.1804		5	ICE	EX55	35.268	38.3	3.032	6.5	280.01	137.59	418.434	-6.5262	93.9167
5	ICE	EX60	35.6483	39.2083	3.56	134.946	346.982	482.751	-25.0151		5	ICE	EX60	35.363	38.3	2.937	6.5	278.563	141.455	420.964	-7.05609	97.6461
6	ICE	COOL0	33.5425	37.2	3.6575	0	0	0	0		6	ICE	COOL0	34.685	37.4	2.715	4	0	0	0	0	19.2531
6	ICE	COOL30	34.135	36.9	2.765	58.7437	20.2835	79.2002	0.812917		6	ICE	COOL30	34.7167	37.4	2.68333	3.5	65.6408	-39.7801	25.9785	4.34974	16.0086
6	ICE	EX0	34.2425	36.9	2.6575	41.2059	25.9166	67.2613	3.95979		6	ICE	EX0	34.7867	37.3	2.51333	3.5	-61.7324	-26.6333	-88.5714	0.679375	10.3786
6	ICE	EX05	34.39	36.9	2.51	46.2396	9.90448	56.2505	0.920104		6	ICE	EX05	34.64	37.3	2.66	4	-159.7	129.65	-30.2281	-14.9539	80.8819
6	ICE	EX10	33.9025	37	3.0975	143.789	8.3651	152.458	1.24312		6	ICE	EX10	35.08	37.4	2.32	4	-124.555	167.211	42.6425	-17.9583	86.9026
6	ICE	EX15	34.1017	37.1	2.99833	155.529	36.8207	192.77	0.415781		6	ICE	EX15	35.6792	37.5	1.82083	4	-109.985	196.595	86.653	-19.9599	87.7475
6	ICE	EX20	34.2225	37.2	2.9775	161.277	41.1073	202.783	0.770417		6	ICE	EX20	35.9567	37.6	1.64333	3.5	-112.772	227.97	115.326	-22.6057	93.1236
6	ICE	EX25	34.3075	37.3	2.9925	175.728	48.584	224.782	0.168958		6	ICE	EX25	36.0167	37.7	1.68333	3.5	-91.5688	218.938	127.499	-21.4928	91.524
6	ICE	EX30	34.4017	37.4	2.99833	190.65	39.7549	230.901	1.19193		6	ICE	EX30	36.0008	37.9	1.89917	5	-87.2707	235.334	148.195	-22.4652	93.1416
6	ICE	EX35	34.53	37.5	2.97	206.522	42.4117	249.486	1.42734		6	ICE	EX35	36.085	38.075	1.99	6	-74.0171	230.49	156.631	-22.1374	96.8989
6	ICE	EX40	34.5625	37.6	3.0375	223.626	34.3436	258.555	2.68557		6	ICE	EX40	36.1167	38.2083	2.09167	6	-16.6893	206.662	190.229	-18.4418	92.7592
6	ICE	EX45	34.6925	37.6	2.9075	224.416	47.3902	272.41	1.44854		6	ICE	EX45	35.9358	38.4	2.46417	6.5	-11.8387	211.642	200.063	-20.4411	100.241
6	ICE	EX50	34.675	37.7	3.025	233.03	53.1027	286.784	1.30292		6	ICE	EX50	35.8967	38.5417	2.645	6.5	60.2778	150.502	211.165	-13.6804	100.17
6	ICE	EX55	35.0383	37.8	2.76167	243.216	59.9443	303.828	0.408958		6	ICE	EX55	35.8617	38.7	2.83833	6.5	8.58536	191.622	200.529	-18.7177	111.617
6	ICE	EX60	35.1467	37.9	2.75333	231.302	68.8315	300.783	-0.902448		6	ICE	EX60	35.7317	38.8	3.06833	7	5.82234	189.449	195.563	-16.9748	108.092
7	ICE	COOL0	34.5692			0	0	0	0		7	ICE	COOL0	34.45	36.7	2.25	4	0	0	0	0	2.81
7	ICE	COOL30	34.8			22.6924	25.4336	48.1648	0.173958		7	ICE	COOL30	34.796	36.4	1.604	4	31.97	-51.98	-20.07	3.75	13.71
7	ICE	EX0	34.81			49.6773	39.5976	89.4233	-0.42724		7	ICE	EX0	34.861	36.3	1.439	3.5	68.93	8.87	77.98	0.07	4.36
7	ICE	EX05	34.925			61.0783	34.1295	95.3592	-1.36036		7	ICE	EX05	34.888	36.37	1.482	3.5	-58.92	20.83	-38.19	-4.37	65.66
7	ICE	EX10	34.7425			117.732	30.9233	148.929	-1.66896		7	ICE	EX10	34.434	36.71	2.276	3	41.74	44.92	86.83	-4.18	73.69
7	ICE	EX15	35.0425			171.916	36.1874	208.492	-1.9663		7	ICE	EX15	34.568	37.1	2.532	3	125.52	64.74	190.69	-3.42	85.76
7	ICE	EX20	35.3925			214.812	44.052	259.43	-1.55469		7	ICE	EX20	34.502	37.37	2.868	3	154.83	68.52	223.88	-3.32	81.47
7	ICE	EX25	35.4842			242.192	50.5787	293.398	-1.88187		7	ICE	EX25	34.517	37.6	3.083	4	179.8	70.3	250.68	-2.93	70.49
7	ICE	EX30	35.53			267.859	58.3391	326.898	-2.19927		7	ICE	EX30	34.532	37.8	3.268	5.5	175.39	76.88	252.85	-3.34	69.72
7	ICE	EX35	35.44			292.952	64.0589	357.802	-2.09458		7	ICE	EX35	34.37	38	3.63	6.5	169.86	85.45	255.87	-4.06	72.91
7	ICE	EX40	35.4658			302.457	72.5595	375.863	-2.71766		7	ICE	EX40	34.596	38.2	3.604	6	205.78	76.98	283.41	-2.95	74.36
7	ICE	EX45	35.5042			302.859	78.2019	381.9	-3.29021		7	ICE	EX45	34.697	38.23	3.533	6	223.63	79.79	304.11	-2.73	76.66
7	ICE	EX50	35.4442			317.827	85.4344	404.156	-3.34745		7	ICE	EX50	34.636	38.3	3.664	6	229.36	77.41	307.49	-2.54	73.8
7	ICE	EX55	35.6508			341.165	92.2988	434.405	-3.08536		7	ICE	EX55	34.636	38.39	3.754	6	238.98	87.1	326.83	-2.65	74.14
7	ICE	EX60	35.65			357.245	98.5965	456.826	-3.29266		7	ICE	EX60	34.549	38.4	3.851	6.5	228.45	102.28	331.48	-3.5	72.73
8	ICE	COOL0	34.9992	37.3	2.30083	0	0	0	0		8	ICE	COOL0	35.644	37.39	1.746	5	0	0	0	0	23.17
8	ICE	COOL30	35.3642	37.1	1.73583	2.1062	79.4023	81.6407	-9.16458		8	ICE	COOL30	35.897	37.4	1.503	5	144.19	-10.35	134.16	4.39	20.96
8	ICE	EX0	34.9267	37.1	2.17333	-46.1589	111.994	65.8902	-11.6699		8	ICE	EX0	36.242	37.5	1.258	5	-12.68	68.2	55.62	-5.28	30.85
8	ICE	EX05	34.5467	37.1	2.55333	74.8499	169.4	244.695	-13.0016		8	ICE	EX05	36.201	37.63	1.429	4.5	-113.27	136.32	23.07	-13.97	122.33
8	ICE	EX10	34.705	37.2	2.495	98.8803	216.162	315.591	-17.7884		8	ICE	EX10	36.254	37.85	1.596	4	-98.36	191.37	93.14	-16.46	121.47
8	ICE	EX15	34.7775			99.4782	245.297	345.384	-21.232		8	ICE	EX15	36.041	38.1	2.059	4	-108.3	249.66	141.57	-19.11	112.31
8	ICE	EX20	34.6633			88.4132	264.091	353.159	-23.0184		8	ICE	EX20	36.006	38.4	2.394	3	-98.48	232.38	134.08	-18.17	129.88
8	ICE	EX25	34.6333			119.399	255.067	375.152	-21.2478		8	ICE	EX25	35.987	38.7	2.713	5	-96.5	255.79	159.53	-19.87	138.77
8	ICE	EX30	34.5683			112.072	306.418	416.096	-25.4259		8	ICE	EX30	35.771	38.9	3.129	6	-76.29	262.52	186.48	-19.14	126.51
8	ICE	EX35	34.5425			111.64	293.364	403.571	-25.7573		8	ICE	EX35	35.558	39.12	3.562	6	-65.66	264.78	199.42	-19.4	122.34
8	ICE	EX40	34.46			122.91	299.573	418.427	-25.7055		8	ICE	EX40	35.563	39.3	3.737	6	-66.13	291.4	225.62	-21.36	120.81
8	ICE	EX45	34.5592			127.375	320.512	444.83	-27.5983		8	ICE	EX45	35.454	39.5	4.046	6.5	-55.75	286.4	230.99	-20.36	120.56
8	ICE	EX50	34.5458			132.184	317.723	436.027	-28.1674		8	ICE	EX50	35.178	39.66	4.482	6	-32.54	281.91	249.79	-19.76	120.42
8	ICE	EX55	34.385								8	ICE	EX55	34.949	39.8	4.851	7	-37.68	297.02	259.77	-20	121.59
8	ICE	EX60	34.4517								8	ICE	EX60		39.8		7	-33.68	325.22	292	-21.35	120.4
9	ICE	COOL0	34.0842	37.3	3.21583	0	0	0	0		9	ICE	COOL0	34.652	37.5	2.848	4	0	0	0	0	36.41
9	ICE	COOL30	34.5575	36.9833	2.42583	153.035	14.0543	167.425	4.55146		9	ICE	COOL30	35.099	37.2	2.101	4	98.78	11.47	110.49	1.41	14.94
9	ICE	EX0	34.7775	36.975	2.1975	72.149	79.3314	151.748	-2.88229		9	ICE	EX0	35.2	37.2	2	4	97	-4.53	92.66	1.56	4.51
9	ICE	EX05	34.6167	37	2.38333	94.5384	109.467	204.356	-5.91042		9	ICE	EX05	34.946	37.2	2.254	3.5	121.47	10.91	132.67	-0.23	72.2
9	ICE	EX10	34.6383	37.1	2.46167	180.221	147.476	328.318	-6.54214		9	ICE	EX10	35.23	37.3	2.07	3.5	199.86	15.21	215.58	0.4	130.52
9	ICE	EX15	34.795	37.2	2.405	209.874	163.564	374.181	-7.69313		9	ICE	EX15	35.283	37.46	2.177	3.5	225.71	17.3	243.57	0.18	133.41
9	ICE	EX20	34.89	37.3	2.41	239.004	162.141	401.954	-7.1025		9	ICE	EX20	35.129	37.6	2.471	3.5	239.31	25.47	265.38	-0.24	133.04
9	ICE	EX25	34.9325	37.4333	2.50083	262.504	181.701	445.071	-8.83943		9	ICE	EX25	35.129	37.7	2.571	4	253.87	25.47	279.96	0.2	129.23
9	ICE	EX30	34.9325	37.6	2.6675	276.949	172.848	450.67	-7.81385		9	ICE	EX30	35.027	37.8	2.773	5	259.42	24.99	285.09	0.42	124.91
9	ICE	EX35	34.9183	37.7	2.78167	283.63	187.187	471.74	-9.54917		9	ICE	EX35	35.11	37.8	2.69	5	280.53	32.3	313.58	-0.04	122.57
9	ICE	EX40	34.7908	37.8	3.00917	275.103	175.437	451.404	-9.11104		9	ICE	EX40	35.164	37.9	2.736	5	284.52	29.6	314.88	0.22	125.96
9	ICE	EX45	34.8875	37.9417	3.05417	290.361	179.337	470.634	-9.27563		9	ICE	EX45	35.103	37.97	2.867	5	302	31.66	334.43	0.5	119
9	ICE	EX50	35.0933	38.1	3.00667	301.723	183.404	486.077	-9.01323		9	ICE	EX50	34.973	38	3.027	5	301.45	26.83	329.08	1.09	115.12
9	ICE	EX55	34.9142	38.2	3.28583	299.429	186.718	487.085	-9.57708		9	ICE	EX55	34.789	38	3.211	5.5	284.8	18.57	304.08	1.78	110.97
9	ICE	EX60	35.1258	38.3	3.17417	311.082	179.218	491.246	-8.8099		9	ICE	EX60	34.253	38	3.747	5.5	210.79	4.06	215.38	2.13	96.12
10	ICE	COOL0	34.54	37.4	2.86	0	0	0	0		10	ICE	COOL0	34.626	37.3	2.674	4	0	0	0	0	39.27
10	ICE	COOL30	34.82	37.3	2.48	219.175	50.3791	270.099	0.318854		10	ICE	COOL30	35.119	37	1.881	4	108.35	20.23	128.87	1.53	34.83
10	ICE	EX0	34.9517	37.2	2.24833	143.374	80.4683	224.269	-3.3		10	ICE	EX0	35.338	36.9	1.562	4	41.52	13.91	55.53	0.17	27.67
10	ICE	EX05	34.8275	37.2667	2.43917	113.785	236.767	351.149	-13.8917		10	ICE	EX05	35.085	36.9	1.815	4	30.27	45.45	75.86	-5.78	128.97
10	ICE	EX10	35.2717	37.3083	2.03667	132.281	266.213	399.202	-15.6936		10	ICE	EX10	35.002	37	1.998	4	72.81	88.52	161.65	-12.38	146.97
10	ICE	EX15	35.51	37.5	1.99	108.509	306.956	416.164	-18.0716		10	ICE	EX15	34.955	37.1	2.145	4	87.43	90.14	177.92	-12.56	143.29
10	ICE	EX20	35.665	37.6333	1.96833	93.9236	331.317	425.939	-19.5639		10	ICE	EX20	34.875	37.25	2.375	4	68.93	133.32	202.62	-17.18	143.94
10	ICE	EX25	35.7908	37.7667	1.97583	113.878	329.848	444.523	-19.535		10	ICE	EX25	34.885	37.4	2.515	4	32.8	131.59	164.66	-18.79	142.19
10	ICE	EX30	35.88	37.9	2.02	124.487	339.786	465.082	-20.1313		10	ICE	EX30	34.627	37.6	2.973	4.5	65.05	116.14	181.47	-16.11	140.68
10	ICE	EX35	35.88	38	2.12	129.365	341.543	471.715	-20.0929		10	ICE	EX35	34.882	37.8	2.918	5	81.94	126.4	208.76	-17.32	145.84
10	ICE	EX40	35.9708	38.1833	2.2125	127.369	356.144	484.352	-21.1695		10	ICE	EX40	34.98	38.01	3.03	5.5	57.51	139.39	197.28	-18.93	125.3
10	ICE	EX45	36.0625	38.3	2.2375	137.284	361.994	500.156	-21.2594		10	ICE	EX45	35.01	38.23	3.22	5.5	79.38	130.88	210.67	-18.25	121.86
10	ICE	EX50	35.9892	38.4	2.41083	140.562	376.251	517.714	-22.0406		10	ICE	EX50	34.988	38.63	3.642	6	90.2	130.6	221.24	-17.85	121.02
10	ICE	EX55	36.1125	38.5583	2.44583	142.977	387.499	531.414	-22.652		10	ICE	EX55	34.998	39.23	4.232	6.5	67.99	144.78	213.18	-19.55	114.09
10	ICE	EX60	36.16	38.6417	2.48167	137.959	398.527	537.432	-23.3128		10	ICE	EX60	35.112	39.33	4.218	6.5	100.45	127.4	228.3	-17.06	116.65
11	ICE	COOL0	34.1425	37.2	3.0575	0	0	0	0		11	ICE	COOL0	34.21	36.6	2.39	4.5	0	0	0	0	45.02
11	ICE	COOL30	34.395	36.8	2.405	94.1119	-13.6918	80.6139	2.84292		11	ICE	COOL30	34.59	36.4	1.81	4	-14.43	-8.5	-23	1.11	25.85
11	ICE	EX0	34.58	36.8	2.22	90.6772	-88.6301	2.11068	5.46698		11	ICE	EX0	34.72	36.3	1.58	3.5	18.38	21.39	39.85	-3.04	24.34
11	ICE	EX05	34.8117	36.9	2.08833	9.96031	68.3967	78.4698	-3.5799		11	ICE	EX05	34.841	36.3	1.459	3.5	-46.71	50.88	4.13	-9.36	135.43
11	ICE	EX10	35.2675	37.2	1.9325	66.6392	82.3315	149.245	-3.40693		11	ICE	EX10	34.65	36.4	1.75	3	60.31	125.11	185.76	-12.05	154.3
11	ICE	EX15	35.4275	37.5	2.0725	57.5599	124.267	182.163	-5.24448		11	ICE	EX15	34.953	36.6	1.647	3	127.06	158.35	285.97	-13.3	154.22
11	ICE	EX20	35.6042	37.8417	2.2375	72.2067	126.023	198.602	-5.23901		11	ICE	EX20	34.885	36.8	1.915	3	158.28	189.35	348.36	-15.33	159.3
11	ICE	EX25	35.5233	38.1083	2.585	115.181	119.061	234.687	-3.8824		11	ICE	EX25	35.029	37	1.971	3.5	169.8	222.69	393.27	-17.81	147.6
11	ICE	EX30	35.5183	38.4	2.88167	94.8428	124.174	219.429	-5.47177		11	ICE	EX30	35.069	37.18	2.111	4.5	186.61	238.29	425.75	-19.02	135.42
11	ICE	EX35	35.6	38.625	3.025	143.313	130.932	274.782	-4.78177		11	ICE	EX35	34.92	37.36	2.44	5	190.84	266.85	458.58	-21.41	150.27
11	ICE	EX40	35.5925	38.8917	3.29917	136.737	117.012	254.245	-5.19427		11	ICE	EX40	34.936	37.52	2.584	5.5	224.13	287.78	512.9	-23.54	151.9
11	ICE	EX45	35.3967	39.1	3.70333	118.993	116.811	236.258	-5.58687		11	ICE	EX45	34.945	37.83	2.885	6	267.22	270.47	538.74	-21.21	144.34
11	ICE	EX50	35.8058	39.3	3.49417	155.374	113.992	269.91	-5.14828		11	ICE	EX50	34.925	38.05	3.125	6	280.39	286.6	568.07	-22.06	136.67
11	ICE	EX55	35.4475	39.5333	4.08583	105.46	119.718	225.595	-5.90052		11	ICE	EX55	34.98	38.1	3.12	6	285.52	297.47	584.08	-22.4	142.16
11	ICE	EX60	35.38	39.775	4.395	101.075	119.431	220.915	-6.43068		11	ICE	EX60	35.06	38.2	3.14	6.5	302.13	299.23	602.5	-22.25	139.1
[truncated: 11 more columns]
